# Supplementary material
Source: PubMed Central journal article supplement (PMC3174660)
Supplement: 1016361108_Appendix.pdf [file 1016361108_Appendix.pdf]

# Supplementary Information for: Biologically induced snowball initiation

Eli Tziperman\* Itay Halevy† David T. Johnston\* Andrew H. Knoll\* and Daniel P. Schrag\*

\*Dept of Earth and Planetary Sciences, Harvard University, 20 Oxford St, Cambridge, MA, 02138, and †Div. of Geological & Planetary Sciences, Caltech, MC 100-23 1200 E. California Blvd., Pasadena, CA, 91125

Prepared using PNAS LATEX package, submitted to Proceedings of the National Academy of Sciences of the United States of America

## SI-1. Overview

The supplementary information is divided into the model formulation (SI-2), a discussion of pyrite formation (SI-3), some additional scenarios supplementing those discussed in the main text and extensive sensitivity tests (SI-4), a calculation of the implications on the oxygen cycle (SI-5) and some back of the envelope calculations verifying model results (SI-6).

## SI-2. Model formulation

We start the model description with a discussion of the carbon mass balance and isotopic mass balance equations (section SI-2.1), and then describe the specific scenario modeled here, specifying the changes to the export production, oxygenic production rate, aerobic remineralization rate and anaerobic remineralization rates (SI-2.2). The equations (dissociation reactions) for the expanded carbonate system are then described, including the carbonate system, boron, sulfate and sulfide (SI-2.3). Because the remineralization of organic matter leads to pH changes, it is essential to include the buffering effect via the dissolution of bottom sediments (SI-2.4). This, in turn, requires that we include the chemical weathering feedback as well for consistency (SI-2.5). The  $\text{Ca}^{2+}$  ion concentration may change significantly due to dissolution and deposition, and is therefore also added as a prognostic variable (SI-2.6). Next, sulfate reduction is discussed, including the pyrite formation sink for the sulfide formed by sulfate reduction (SI-2.7), and followed by iron reduction and siderite formation (SI-2.8). Several of the processes listed above contribute to carbonate alkalinity changes, which in turn plays a critical role in setting the atmospheric  $\text{CO}_2$  concentration, and the corresponding charge budget is presented (SI-2.9). The solution method of the expanded carbonate system is described in (SI-2.10), including both an exact numerical solution and an approximate solution which provides some intuition into the effects of the alkalinity changes due to sulfate reduction.

The model parameters that are kept constant across model scenario runs are given in Table SI-2. Model parameters that vary among the scenarios are given in Table SI-3.

**SI-2.1 Mass and  $\delta^{13}\text{C}$  conservation equations.** The mass balances for organic (particulate and dissolved) and inorganic carbon are

$$\begin{aligned} \frac{dM_{\text{org}}}{dt} &= F_{\text{prod}} - F_{\text{remin}} - F_{\text{b,org}} \\ \frac{dM_{\text{inorg}}}{dt} &= F_{\text{in}} + F_{\text{remin}} - F_{\text{prod}} - F_{\text{b,inorg}} \end{aligned} \quad [\text{SI-1}]$$

Where  $F_{\text{prod}}$  is the rate of production of organic matter by oxygenic photosynthesis (in units of  $10^{13}\text{kg}$  carbon per year), while  $F_{\text{remin}}$  is the remineralization by aerobic processes, and by sulfate reduction and iron reduction.  $F_{\text{in}}$  is the flux from volcanoes and weathering, and  $F_{\text{b,org}}$ ,  $F_{\text{b,inorg}}$  are the organic and inorganic burial rates. The mass balance equations for

the fractions of organic and inorganic carbon that is of  $^{13}\text{C}$  isotopic composition are,

$$\begin{aligned} \frac{d(\delta_{\text{org}} M_{\text{org}})}{dt} &= F_{\text{prod}}(\delta_{\text{inorg}} + \varepsilon) - F_{\text{remin}}\delta_{\text{org}} - F_{\text{b,org}}\delta_{\text{org}}, \\ \frac{d(\delta_{\text{inorg}} M_{\text{inorg}})}{dt} &= F_{\text{in}}\delta_{\text{in}} + F_{\text{remin}}\delta_{\text{org}} \\ &\quad - F_{\text{prod}}(\delta_{\text{inorg}} + \varepsilon) - F_{\text{b,inorg}}\delta_{\text{inorg}}. \end{aligned} \quad [\text{SI-2}]$$

The isotopic composition of new organic material is  $\delta_{\text{inorg}} + \varepsilon$ , with  $\varepsilon < 0$ . Using the above mass balance equations, the last two equations may be written as

$$\begin{aligned} M_{\text{org}} \frac{d\delta_{\text{org}}}{dt} &= F_{\text{prod}}(\delta_{\text{inorg}} + \varepsilon - \delta_{\text{org}}), \\ M_{\text{inorg}} \frac{d\delta_{\text{inorg}}}{dt} &= F_{\text{in}}(\delta_{\text{in}} - \delta_{\text{inorg}}) - (F_{\text{prod}} - F_{\text{remin}})\varepsilon \\ &\quad - F_{\text{remin}}(\delta_{\text{inorg}} + \varepsilon - \delta_{\text{org}}). \end{aligned} \quad [\text{SI-3}]$$

These are the equations used to obtain the model results discussed within the paper itself. Before proceeding with the model description, consider some further simplifications that are useful in order to get some intuition into the model results. Because of the large production and remineralization fluxes, the isotopic composition of organic matter,  $\delta_{\text{org}}$ , tends to be in a quasi-steady state ( $\frac{d}{dt}\delta_{\text{org}} = 0$ ), while the equations for the total organic and inorganic mass and the inorganic isotopic are not necessarily in a steady state. If the inorganic isotopic composition  $\delta_{\text{inorg}}$  undergoes an excursion, then at its minimum point, where  $\frac{d}{dt}\delta_{\text{inorg}} = 0$  we have

$$\begin{aligned} \delta_{\text{org}} &= \delta_{\text{inorg}} + \varepsilon \\ \delta_{\text{inorg}} &= \delta_{\text{in}} - f^{\delta}\varepsilon, \end{aligned} \quad [\text{SI-4}]$$

where

$$f^{\delta} = \frac{F_{\text{prod}} - F_{\text{remin}}}{F_{\text{in}}} \quad [\text{SI-5}]$$

Note that because a steady state is not assumed for the mass balance equations,  $f^{\delta}$  is not necessarily equal to the organic burial fraction. The consequences of these relations are discussed in the accompanying paper.

---

Reserved for Publication Footnotes

**SI-2.2 Increased export production and sulfate remineralization scenario.** Following standard model formulation, we specify the background (that is, steady state values before the applied perturbation to the export production) remineralization and export production as fraction of the oxygenic production flux,

$$\begin{aligned} F_{\text{remin},0} &= \alpha_{\text{remin}} F_{\text{prod},0}, \\ F_{\text{ep},0} &= (1 - \alpha_{\text{remin}}) F_{\text{prod},0}, \\ F_{\text{remin}} &= F_{\text{remin},\text{O}_2} + F_{\text{remin},\text{SO}_4} + F_{\text{remin},\text{Fe}}, \\ F_{\text{b,org}} &= F_{\text{ep},0}. \end{aligned} \quad [\text{SI-6}]$$

Next, we specify the changes to the export production and remineralization fluxes during the enhanced export production scenario. With  $U$  the amplitude of the increase to the export production, we prescribe the changes to the oxygenic production and remineralization as well as to the anoxic remineralization by sulfate reduction and iron reduction, as fractions of  $U$ ,

$$\begin{aligned} F_{\text{ep}} &= F_{\text{ep},0} + U F_{\text{ep},0} \mathcal{H}(t), \\ F_{\text{prod}} &= F_{\text{prod},0} - \gamma U F_{\text{ep},0} \mathcal{H}(t), \\ F_{\text{remin},\text{O}_2} &= F_{\text{remin},0} - \beta U F_{\text{ep},0} \mathcal{H}(t), \\ F_{\text{remin},\text{SO}_4} &= \alpha U F_{\text{ep},0} \mathcal{H}(t), \\ F_{\text{remin},\text{Fe}} &= \eta U F_{\text{ep},0} \mathcal{H}(t). \end{aligned} \quad [\text{SI-7}]$$

The scaling factors  $\alpha$ ,  $\beta$ ,  $\gamma$  and  $\eta$  are given in tables SI-2 and SI-3. The specified transient perturbation to the different carbon fluxes first increases and then decreases. The time dependence is a Gaussian in time, chosen for simplicity and represented by  $\mathcal{H}(t) = \exp(-(t-t_0)^2/\tau_{\text{ep}}^2)$ . Model experiments 7, 8 and 9 use instead a step-function like forcing having the same area under the curve,

$$\mathcal{H}(t) = \begin{cases} \sqrt{\pi}/2 & |t-t_0| < \tau_{\text{ep}} \\ 0 & \text{elsewhere} \end{cases} \quad [\text{SI-8}]$$

which allows us to examine the model response time scale, please see discussion in section below. As seen in the accompanying paper, the perturbation to the fluxes leads to a  $\text{CO}_2$  drawdown. One expects the ensuing glacial conditions to lead to a severe perturbation to the marine biology, so that the specified dependence of the fluxes beyond that point (i.e., the decaying part of the Gaussian perturbation) is not expected to be meaningful.

**SI-2.3 The expanded carbonate system.** The relevant set of dissociation and dissolution reactions is,

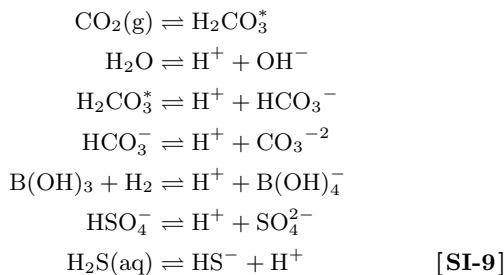

where  $\text{H}_2\text{CO}_3^* \equiv \text{CO}_2^* \equiv \text{CO}_2(\text{aq}) + \text{H}_2\text{CO}_3$ , and it is assumed that the first dissociation of the sulfuric acid,  $\text{H}_2\text{SO}_4$ , is complete because it is a strong acid. The 12 unknowns are,

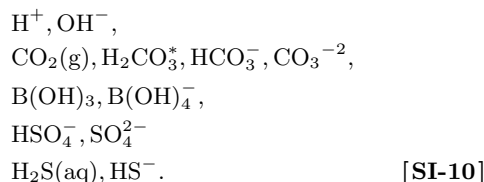

These are solved for using the above 7 equations of the expanded carbonate system, plus 5 constraints on the total carbon, total boron, total sulfate, total sulfide and a generalized alkalinity  $Alk_G$  (all of which to be calculate later via prognostic equations),

$$\begin{aligned} C_T &= [\text{H}_2\text{CO}_3^*] + [\text{HCO}_3^-] + [\text{CO}_3^{2-}], \\ B_T &= [\text{B}(\text{OH})_4^-] + [\text{B}(\text{OH})_3], \\ S_T &= [\text{HSO}_4^-] + [\text{SO}_4^{2-}], \\ (\text{H}_2\text{S})_T &= [\text{H}_2\text{S}(\text{aq})] + [\text{HS}^-], \\ Alk_G &= [\text{HCO}_3^-] + 2[\text{CO}_3^{2-}] + [\text{B}(\text{OH})_4^-] + [\text{HSO}_4^-] \\ &\quad + 2[\text{SO}_4^{2-}] + [\text{HS}^-] + [\text{OH}^-] - [\text{H}^+]. \end{aligned} \quad [\text{SI-11}]$$

We include  $\text{SO}_4^{2-}$  and  $\text{HSO}_4^-$  in the charge balance, although the second dissociation of sulfuric acid is sufficiently complete that it could be assumed to occur completely. The contribution of variations in these terms to the variations in the charge balance turns out to be small, of the order of that due to the hydrogen ion.

**SI-2.4 Dissolution and precipitation of bottom sediments.**

The changes in DIC concentration lead to corresponding changes to the carbonate ( $\text{CO}_3^{2-}$ ) ion concentration, which may bring  $\text{CaCO}_3$  to under or over saturation and lead to dissolution or deposition of  $\text{CaCO}_3$  sediments. This, in turn, would affect both the total DIC and the alkalinity and as a result regulate the pH. The inorganic burial also includes siderite formation and may be formulated as follows [1],

$$\begin{aligned} F_{\text{b,inorg},\ell} &= \frac{[Alk_0]}{\tau_{\text{CaCO}_3}} \text{sign}(\Delta\Omega)(\Delta\Omega)^{4.5} + F_{\text{siderite}}, \\ \Delta\Omega &\equiv \frac{[\text{CO}_3^{2-}]}{[\text{CO}_3^{2-}]_{\text{sat}}} - 1. \end{aligned} \quad [\text{SI-12}]$$

The subscript  $\ell$  in  $F_{\text{flux},\ell}$  is the flux  $F_{\text{flux}}$  measured in units of  $\mu$  mole carbon per liter per year instead of Peta ( $10^{15}$ ) kg carbon per year,

$$\begin{aligned} F_{\text{flux},\ell} &= F_{\text{flux}} \frac{10^{15} \text{ kg } C}{\text{year}} \times \frac{1}{V_{\text{ocean}}} \text{ liter}^{-1} \times 83.3 \cdot 10^6 \frac{\mu \text{ mole } C}{\text{kg } C} \\ &= (F_{\text{flux}} \times f_{c/\ell}) \frac{\mu \text{ mole } C}{\text{liter} \times \text{year}} \end{aligned} \quad [\text{SI-13}]$$

where  $f_{c/\ell} = 60.8$ .

**SI-2.5 Weathering.** Assume that a fraction  $0 \leq \alpha_{\text{wthr}} \leq 1$  of the  $\text{CO}_2$  from volcanic activity finds its way to the ocean via silicate weathering, while the rest,  $1 - \alpha_{\text{wthr}}$ , is absorbed by the ocean directly, without the accompanying  $\text{Ca}^{2+}$ . The weathering fraction  $\alpha_{\text{wthr}}$  is a function of the temperature, as a higher temperature leads to enhanced chemical weathering.

We parameterize the dependence of  $\alpha_{\text{wthr}}$  on temperature following Berner's GEOCARB II model (eqn 31 in [2]),

$$f_B(T) = \{\exp[0.090(T - T_0)]\} \times [1 + 0.038(T - T_0)]^{0.65}$$

where  $T_0$  is the present-day global mean temperature. Prescribing a relation between temperature and atmospheric  $\text{CO}_2$  we can write the above weathering feedback as function of  $\text{CO}_2$  ([2] eqn 33, neglecting fertilization effects for land plants

which did not exist yet during the Neoproterozoic, as well as solar variations),

$$f_B(RCO_2) = (RCO_2)^{0.09\Gamma} \times [1 + 0.038\Gamma \ln(RCO_2)]^{0.65}$$

where  $RCO_2$  is the ratio between the  $pCO_2$  concentration and that of present day. The sensitivity of temperature to  $CO_2$  is given by  $\Gamma$  which is defined via,

$$T(t) - T(0) = \Gamma \ln(RCO_2),$$

so that a value of  $\Gamma = 6^\circ C$  corresponds to a  $4^\circ C$  warming for a doubling of  $CO_2$ . The parameterization  $f_B(RCO_2)$  is monotonically increasing as function of the  $pCO_2$  and we set the weathering fraction to be,

$$\alpha_{wthr}(RCO_2) = \alpha_{wthr,0} \times f_B(RCO_2). \quad [SI-14]$$

This parameter is, of course, allowed to vary only between zero and one.

**SI-2.6 Calcium ion budget.** The concentration of  $Ca^{2+}$  depends on both the sedimentation rate and the input from weathering,

$$\frac{d}{dt} Ca^{2+} = F_{in,Ca^{2+},\ell} - F_{b,inorg,\ell}, \quad [SI-15]$$

Where  $F_{in,Ca^{2+},\ell}$  is a prescribed input flux (calculated using the weathering parameterization), and the second term represents the effect of sedimentation/dissolution on  $CaCO_3$ .

The calcium carbonate precipitation reaction may be written in several equivalent ways, all involving the loss of two alkalinity unit and one DIC unit. This has the net effect of increasing  $pCO_2$  and, by itself, could function as a negative feedback on the scenario analyzed here. But this reaction needs to be considered together with the rest of the picture and in particular the burial of DIC via siderite formation and the addition of alkalinity via sulfate reduction followed by pyrite formation. With these processes included, the net effect presented in the scenario here is a reduction of atmospheric  $pCO_2$ .

**SI-2.7 Remineralization via sulfate reduction.** The anoxic remineralization of organic matter via sulfate ( $SO_4^{2-}$ ) reduction, most likely occurring in the upper sediment layers, leads to the formation of sulfide ( $H_2S$ , or in dissociated form,  $HS^-$ ) which can then either diffuse toward the oxygenated upper ocean and be oxidized there back into sulfate, or react with iron to form pyrite. These three processes may be represented by,

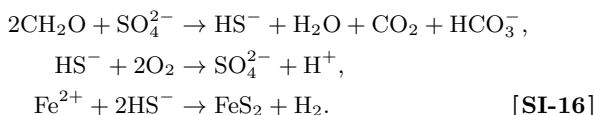

The oxidation of organic matter via sulfate reduction leads to a change in the sulfate and sulfide concentrations (as well as contributes to the mass and isotopic balances, see section SI-2.1) as follows,

$$\begin{aligned} \frac{d}{dt}(H_2S)_T &= +\frac{1}{2}F_{remin,SO_4,\ell} - F_{H_2S,mixing} - F_{pyrite}, \\ \frac{d}{dt}S_T &= -\frac{1}{2}F_{remin,SO_4,\ell} + F_{H_2S,mixing}. \end{aligned} \quad [SI-17]$$

The factor of one half is needed because the oxidation of two mole of carbon involves turning one mole of sulfate into  $H_2S$ .

The mixing and pyrite formation fluxes are parameterized as,

$$\begin{aligned} F_{H_2S,mixing} &= \frac{(H_2S)_T}{\tau_{mixing}}, \\ F_{pyrite} &= \frac{(H_2S)_T}{\tau_{pyrite}}, \end{aligned} \quad [SI-18]$$

where  $\tau_{mixing}$  and  $\tau_{pyrite}$  are specified time scales for both processes, and these fluxes are in units of moles of S per unit time. In the present-day ocean nearly all (about 90%) of the sulfide formed in the sediments by sulfate reduction escapes into the ocean and is oxidized there back to sulfate. In the anoxic Neoproterozoic ocean, one expects that even some of the sulfide escaping into the water column will still form pyrite there before getting to the oxygenated upper ocean. We therefore choose the pyrite formation time scale to be equal to the mixing time scale. As a result, half of the sulfide forms pyrite and half is oxidized. Changing this ratio does not have a significant effect on the results. If more of the sulfide is oxidized into sulfate, one needs to postulate more export production of organic matter to remineralized and contribute to the alkalinity budget and  $CO_2$  reduction. The scenario is not significantly affected otherwise and, in particular, the total required sulfate or iron, the limiting factors in this scenario as explained in the paper, do not change. Finally, note that the pyrite formation [SI-16]c also affects the generalized alkalinity as defined here [SI-11] by removing sulfide ions  $HS^-$ .

**SI-2.8 Remineralization via iron reduction.** Next, consider the anoxic remineralization of the exported organic matter by iron reducing bacteria which reduce  $Fe^{3+}$  into  $Fe^{2+}$  while remineralizing the organic matter into DIC. This reaction may again be followed by either the mixing of  $Fe^{2+}$  to the upper ocean and its oxidation back into  $Fe^{3+}$ , or by siderite ( $FeCO_3$ ) formation. These three reactions are represented by,

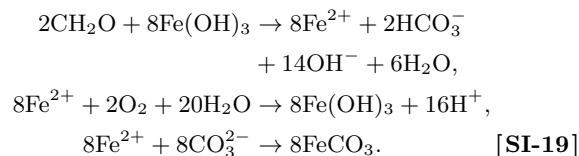

$Fe^{2+}$  is soluble, and given the above stoichiometry we write an equation for its concentration, including the production by iron reduction, the loss to siderite formation and the gain from the oxidation of  $Fe^{3+}$  as follows,

$$\frac{d}{dt}Fe^{2+} = 4F_{remin,Fe}/f_c/\ell - F_{siderite} - F_{Fe,mixing}. \quad [SI-20]$$

$Fe^{3+}$  is practically insoluble, it accumulates in the sediments where it can be used by iron reducing bacteria [3,4]. We need to estimate the  $Fe^{3+}$  flux required to sustain the iron remineralization. The rate of consumption of  $Fe^{3+}$  (calculated initially for convenience in units of micromole per liter per year) is given by,

$$\frac{d}{dt}Fe^{3+} = -4F_{remin,Fe}/f_c/\ell + F_{Fe,mixing}, \quad [SI-21]$$

and the implied needed iron flux into the ocean in moles iron per year is then obtained by multiplying the left hand side by the ocean volume in liters and converting from micromoles to moles,

$$\text{Flux}(Fe^{3+}) = 10^{-6}V_{ocean} \frac{d}{dt}Fe^{3+}. \quad [SI-22]$$

We parameterize the rate of siderite deposition in the sediments, as well as the rate of mixing of  $Fe^{2+}$  into the aerobic upper ocean zone, where it is oxidized back to  $Fe^{3+}$ , similarly

to the formulation of pyrite formation and sulfide oxidation in the previous subsection, in moles Fe per unit time, as,

$$\begin{aligned} F_{\text{siderite}} &= \frac{Fe^{2+}}{\tau_{\text{siderite}}}, \\ F_{\text{Fe,mixing}} &= \frac{Fe^{2+}}{\tau_{\text{mixing}}}. \end{aligned} \quad [\text{SI-23}]$$

It is worth noting that the siderite formation reaction appears in the literature in different forms. Some of these, including the one used here, are,

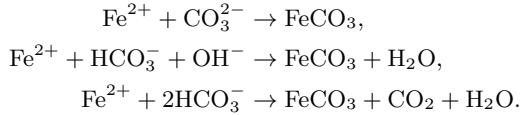

While these are different reactions, it is important to note that they are completely equivalent from our perspective here. All involve the loss of two units of alkalinity (either as  $CO_3^{2-}$ ,  $2HCO_3^-$ , or a combination of  $HCO_3^-$  and  $OH^-$ ). All three also involve the net loss of one unit of DIC (in the third reaction two units are lost on the left hand side, but one is gained back on the rhs).

$CO_2$ ,  $HCO_3^-$  and  $OH^-$  are all in equilibrium within the ocean carbonate system. Because the above three siderite formation reactions have the same effects on DIC and alkalinity, and because we equilibrate the carbonate system at every time step of the model, the three are completely equivalent and would lead to the same changes to the pH and  $pCO_2$ .

**SI-2.9 Alkalinity budget.** The weathering flux of each mole of carbon in the form of  $CaCO_3$  is accompanied by a two mole change in alkalinity due to the double charge of  $CO_3^{2-}$ . In addition, the alkalinity budget is affected by the inorganic burial of calcium carbonate which removes carbonate ions, pyrite formation eliminates sulfide ions, siderite formation eliminates carbonate ions again, and iron reduction and oxidation also affect the alkalinity as discussed above. The corresponding alkalinity budget equation is therefore,

$$\begin{aligned} \frac{d}{dt} Alk_G &= 2 \times \alpha_{\text{wthr}} F_{\text{in},\ell} - 2 \times F_{\text{b,inorg},\ell} - F_{\text{pyrite}} \\ &+ 8F_{\text{remin,Fe}} - 2F_{\text{Fe,mixing}} - 2F_{\text{siderite}}. \end{aligned} \quad [\text{SI-24}]$$

Note that two moles of alkalinity are lost per mole of iron deposited as siderite [SI-19]c, two moles of alkalinity are lost per mole of  $Fe^{2+}$  diffusing toward the aerobic zone and being oxidized to  $Fe^{3+}$ , while 8 moles of alkalinity are gained per mole of carbon remineralized by iron reduction [SI-19]a. Also remember that  $F_{\text{pyrite}}$  is in units of moles of S per unit time rather than moles of pyrite buried per unit time.

**SI-2.10 Solving the expanded carbonate system.** In the first subsection below (SI-2.10.1) we describe the numerical algorithm for solving the full expanded carbonate system, as used in the model solutions presented above. The standard method of forming a polynomial equation and solving it iteratively is not appropriate in this case given the larger number of equations which leads to a high order polynomial. We therefore use a gradient based optimization method and provide the gradient analytically. The second subsection (SI-2.10.2) describes the solution of an approximate carbonate system which includes sulfide, yet is sufficiently simple to provide some intuition into the full solution.

### SI-2.10.1 Numerical solution of the full expanded carbonate system

In order to solve the carbonate system using an optimization approach, write the equations for the dissociation reactions [SI-9] as,

$$\begin{aligned} K_w &= [H^+][OH^-], \\ K_0(T, S, P) &= \frac{[H_2CO_3^*]}{[CO_2(g)]}, \\ K_1(T, S, P) &= \frac{[H^+][HCO_3^-]}{[H_2CO_3^*]}, \\ K_2(T, S, P) &= \frac{[H^+][CO_3^{2-}]}{[HCO_3^-]}, \\ K_{HSO_4} &= \frac{[H^+][SO_4^{2-}]}{[HSO_4^-]}, \\ K_B &= \frac{[H^+][B(OH)_4^-]}{[B(OH)_3]}, \\ K_{H_2S,1}(T, S, P) &= \frac{[H^+][HS^-]}{[H_2S(aq)]}. \end{aligned} \quad [\text{SI-25}]$$

Where the carbonate dissociation constants are taken from [5]. Sulfate and sulfide dissociation constants are from from "AquaEnv" [6]. We take  $pH = -\log_{10}([H^+])$ . Differences from other scales should be minor. Together with the definitions of total carbon, sulfate, sulfide, boron and alkalinity [SI-11], we write the complete set of equations in the following form,

$$\begin{aligned} 0 &= F_1 = K_w - [H^+][OH^-] \\ 0 &= F_2 = K_0(T, S, P)[CO_2(g)] - [H_2CO_3^*] \\ 0 &= F_3 = K_1(T, S, P)[H_2CO_3^*] - [H^+][HCO_3^-] \\ 0 &= F_4 = K_2(T, S, P)[HCO_3^-] - [H^+][CO_3^{2-}] \\ 0 &= F_5 = K_{HSO_4}[HSO_4^-] - [H^+][SO_4^{2-}] \\ 0 &= F_6 = K_B[B(OH)_3] - [H^+][B(OH)_4^-] \\ 0 &= F_7 = K_{H_2S,1}[H_2S(aq)] - [H^+][HS^-] \\ 0 &= F_8 = [H_2CO_3^*] + [HCO_3^-] + [CO_3^{2-}] - C_T \\ 0 &= F_9 = [B(OH)_4^-] + [B(OH)_3] - B_T \\ 0 &= F_{10} = [HSO_4^-] + [SO_4^{2-}] - S_T \\ 0 &= F_{11} = [HS^-] + [H_2S(aq)] - (H_2S)_T \\ 0 &= F_{12} = [HCO_3^-] + 2[CO_3^{2-}] + [B(OH)_4^-] + [HSO_4^-] \\ &+ 2[SO_4^{2-}] + [HS^-] + [OH^-] - [H^+] - Alk_G \end{aligned}$$

Ordering the vector of unknowns as shown in Table SI-1, the Jacobian (needed for the optimization solver) is,

$$\frac{\partial F_i}{\partial X_j} = \begin{pmatrix} \frac{\partial F_1}{\partial X_1} & \cdots & \frac{\partial F_1}{\partial X_n} \\ \frac{\partial F_2}{\partial X_1} & \cdots & \frac{\partial F_2}{\partial X_n} \\ \vdots & \ddots & \vdots \\ \frac{\partial F_n}{\partial X_1} & \cdots & \frac{\partial F_n}{\partial X_n} \end{pmatrix} \quad [\text{SI-26}]$$

which, for the above system is again shown in Table SI-1.

For the optimization routine to work efficiently, we scale the variables and Jacobian to make all variables order one,

$$\begin{aligned} X'_i &= X_i / \text{scale}_i, \\ \frac{\partial F_i}{\partial X'_j} &= \text{scale}_j \frac{\partial F_i}{\partial X_j}. \end{aligned}$$

We use Matlab's `fsolve` routine and the resulting solution of the expanded carbonate system is accurate to round-off error.

### SI-2.10.2 Approximate solution of the expanded carbonate system

Consider an approximate solution to the carbonate+sulfide system. The approximation used here for DIC is valid only at pH values around 8, and for small perturbations to the DIC and H<sub>2</sub>S. It is not used in the model calculations and is only shown in order to provide intuition into the expanded carbonate system.

Let the unknowns be the concentrations of CO<sub>2</sub>(g), CO<sub>2</sub>(aq), HCO<sub>3</sub><sup>-</sup>, CO<sub>3</sub><sup>2-</sup>, H<sub>2</sub>S(aq), HS<sup>-</sup>, H<sup>+</sup>. With a total of seven unknown, we need seven equations,

$$\begin{aligned} K_H &= \frac{[\text{CO}_2(\text{aq})]}{[\text{CO}_2(\text{g})]}, \\ K_1 &= \frac{[\text{HCO}_3^-][\text{H}^+]}{[\text{CO}_2(\text{aq})]}, \\ K_2 &= \frac{[\text{CO}_3^{2-}][\text{H}^+]}{[\text{HCO}_3^-]}, \\ K_{S1} &= \frac{[\text{HS}^-][\text{H}^+]}{[\text{H}_2\text{S}(\text{aq})]}, \\ C_T &= [\text{HCO}_3^-] + [\text{CO}_3^{2-}], \\ (\text{H}_2\text{S})_T &= [\text{HS}^-] + [\text{H}_2\text{S}(\text{aq})] \approx [\text{HS}^-], \\ \text{Alk} &= [\text{HCO}_3^-] + 2[\text{CO}_3^{2-}] + [\text{HS}^-]. \end{aligned} \quad [\text{SI-27}]$$

The last three equations give,

$$\begin{aligned} [\text{HCO}_3^-] &= 2C_T - [\text{Alk} - (\text{H}_2\text{S})_T] = 2C_T - \text{Alk}_C, \\ [\text{CO}_3^{2-}] &= [\text{Alk} - (\text{H}_2\text{S})_T] - C_T = \text{Alk}_C - C_T, \\ [\text{HS}^-] &= (\text{H}_2\text{S})_T, \end{aligned}$$

where the carbonate alkalinity is given by

$$\text{Alk}_C \equiv [\text{HCO}_3^-] + 2[\text{CO}_3^{2-}] = \text{Alk} - \text{HS}^- \approx \text{Alk} - (\text{H}_2\text{S})_T.$$

Using the  $K_2$  equation,

$$[\text{H}^+] = K_2 \frac{2C_T - \text{Alk}_C}{\text{Alk}_C - C_T},$$

next, using the  $K_1$  equation,

$$[\text{CO}_2(\text{aq})] = \frac{K_2 (2C_T - \text{Alk}_C)^2}{K_1 (\text{Alk}_C - C_T)}$$

which, using Henry's law, gives

$$[\text{CO}_2(\text{g})] = \frac{K_2 (2C_T - \text{Alk}_C)^2}{K_1 K_H (\text{Alk}_C - C_T)}. \quad [\text{SI-28}]$$

Given that  $\text{Alk}_C > C_T$ , the last equation makes it clear that if the carbonate alkalinity increases, the atmospheric CO<sub>2</sub> decreases.

### SI-3. Pyrite formation

Pyrite, FeS<sub>2</sub>, is believed to commonly form in anoxic marine sediments via a reaction of Fe<sup>2+</sup> with sulfide H<sub>2</sub>S resulting from sulfate reduction of organic matter. The formation proceeds in two stages. The first phase [7] is the formation of brownish black amorphous Fe<sup>2+</sup> monosulfide, FeS,

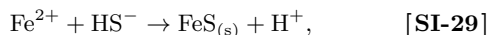

which, according to [7], is actually a shorthand for,

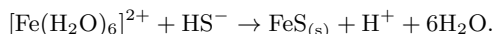

The iron monosulfide can take several forms and have different stoichiometric relations around F<sub>1</sub>S<sub>1</sub>. When it forms crystals it is exactly represented by FeS with a small (nano scale) crystal size, and is then referred to as Mackinawite [7], although this name is used for non-crystalline amorphous iron monosulfide by some authors.

The literature contains several possible scenarios and some strong disagreements regarding the second phase of pyrite formation. Some [8–10] suggest that this occurs via oxidation by elemental sulfur,

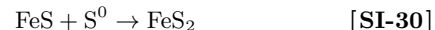

This requires a reaction for the formation of S<sup>0</sup> from H<sub>2</sub>S, probably via some bacterial path [9, 10]. However, [7] point out that S<sup>0</sup> is in fact S<sub>8</sub>, making the above reaction an impossible multi-molecular reaction step mechanism, although the stoichiometry of the reaction may still be correct.

Alternatively, the second step may occur via an oxidation by H<sub>2</sub>S,

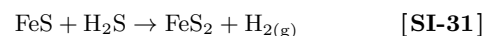

In this case the combined pyrite formation reaction of [SI-29] and [SI-31] is

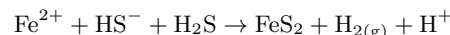

which is stoichiometrically equivalent to

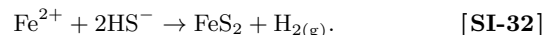

This is the reaction used in the paper itself and it is further justified below.

Interestingly, [8] states that reaction [SI-32] “has never been observed ... during several years of experimentation”. [11] do observe the reaction [SI-32] at 100°C, yet [12] reject the scenario of [SI-31] and [SI-32], present experimental data showing that as long as the iron monosulfide is kept in a reducing atmosphere, devoid of any reactant other than H<sub>2</sub>S, Mackinawite is the stable phase and the formation of pyrite is inhibited. They state,

Numerous experimental studies have demonstrated that at temperatures below 100°C the conversion of unoxidized Mackinawite to pyrite is a very slow process. It was shown that this is not an important process in low temperature pyrite formation ...

and

These new experiments have shown that in reducing H<sub>2</sub>S and HS<sup>-</sup> solutions, pyrite forms at a negligible to very slow rate.

The very extensive review by [7] suggests how to resolve these contradicting results. They, and [13], first explain that the conversion of monosulfide (Mackinawite or otherwise) to pyrite is not a solid phase reaction. The oxidation of FeS to pyrite involves the dissolution of FeS to form an aqueous FeS complex, FeS(aq), which is oxidized to form FeS<sub>2</sub>, which is then recrystallized as pyrite. During this process, the S(-II) is oxidized to S(-I) and the Fe<sup>2+</sup> remains unoxidized. As an evidence that this cannot be a solid phase reaction they show that the formed crystals of pyrite are orders of magnitude larger than the original ones of Mackinawite. In this sense solid Mackinawite is not strictly a necessary precursor for pyrite formation.

According to [7], pyrite formation involves two distinct physical processes, nucleation and crystal growth. Pyrite crystal growth is quite fast, but nucleation of pyrite crystals is slow and can be the rate-limiting phase in the conversion of

monosulfide to pyrite. The critical point is that the nucleation is sensitive to trace element catalysis and inhibitors. As an example of such catalytic effects on the formation of iron sulfides, [13] demonstrate the catalytic effect of aldehydic carbonyl groups (-CHO) in the formation of greigite, Fe<sub>3</sub>S<sub>4</sub>, from amorphous FeS via the H<sub>2</sub>S path.

In a related paper, [14] demonstrate the sulfide path [SI-29], [SI-31] and [SI-32] under strictly anoxic conditions. They also explain that,

The metastable persistence of FeS with H<sub>2</sub>S is well known [12, 15]. The pyrite nucleation barrier must be overcome for bulk formation of FeS<sub>2</sub>, since pyrite formation on a suitable substrate with only FeS and H<sub>2</sub>S is fast [16]. Such substrates are reaction initiators and may include partially oxidized FeS [12], greigite, sulfur grains, bacterial cell walls [17] or pyrite [16].

The role of bacterial cell walls was demonstrated by [17] who write “In vitro enrichment cultures of dissimilatory sulfate-reducing bacteria precipitated FeS and catalyzed its transformation into FeS<sub>2</sub> at ambient temperature and pressure under anaerobic conditions. When compared to purely abiotic processes, the bacterially mediated transformation was shown to be more efficient in transforming FeS into FeS<sub>2</sub>.”

It is important to realize that some alternative pyrite formation scenarios such as SI-30 and some others considered in the literature lead to the elimination of alkalinity added during sulfate reduction, and eliminate the pCO<sub>2</sub> reduction predicted here. While pyrite formation is not sufficiently well understood to rule out the path used here, we do note that this issue adds uncertainty to our proposed scenario of pCO<sub>2</sub> reduction via sulfate remineralization.

**The bottom line** is that in the presence of appropriate catalysts, especially organic materials of which there should be no shortage in anoxic sediments where pyrite forms, the H<sub>2</sub>S path [SI-32] seems an appropriate representation of pyrite formation. The reason this path was not seen in many experiments is most likely that they were conducted under inorganic conditions and without the needed catalysts to accelerate the rate-limiting nucleation phase of pyrite formation. Even if one does not accept the catalyst scenario, the debate in the literature indicates that [SI-32] is considered at least by some a possible path for pyrite formation, and one is justified in considering its consequences as we do here.

**SI-3.1 The fate of hydrogen from pyrite formation.** The hydrogen produced by the pyrite formation in the anoxic sediments [SI-32] may be used by methanogens,

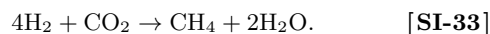

Some of the methane may accumulate in the deep ocean as methane clathrates and this reaction can therefore contribute to the reduction of the total DIC. Alternatively, some of the methane could diffuse up to the oxic upper ocean to be oxidized back to CO<sub>2</sub>,

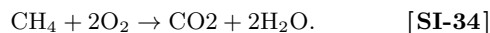

The net reaction is therefore simply

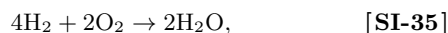

and may be ignored as far as the effect on alkalinity or total CO<sub>2</sub>.

It is interesting to note that the above path leading to the accumulation of methane clathrates could be linked to the snowball initiation scenario of [18] if these clathrates are released to the atmosphere at some later time.

## SI-4. Additional scenarios and sensitivity study

The parameters for the different scenarios shown here and in the main paper are all given in Tables SI-2 and SI-3. Fig. SI-1 shows fuller details of scenario #1 from the main paper, where aerobic remineralization is used to produce an isotopic signal of 15 permil and results in a very large pCO<sub>2</sub> increase.

**SI-4.1. Additional scenarios.** Figs. SI-3 and SI-4 show scenarios #3 and #4 in which the same isotopic signal and pCO<sub>2</sub> decrease presented in our main scenario (#2, Fig. 3 in the paper) are obtained by sulfate reduction only and by iron reduction only, correspondingly. Note the larger requirements of sulfate and Fe<sup>3+</sup> in these two scenarios, correspondingly.

Scenario #5 (Fig. SI-5) shows the same isotopic signal, but effectively no change in atmospheric CO<sub>2</sub>. Finally, Fig. SI-6 shows the results of scenario #6 in which the same CO<sub>2</sub> drawdown is obtained as in our main scenario (#2, Fig. 3 in paper), but with no isotopic signal. Note that hardly any net remineralization is needed in this case.

While also being interesting on their own, taken together, these scenarios compose a set of sensitivity experiments. These experiments, together with the corresponding model parameter values in Table SI-3, demonstrate that the scenarios leading to an isotopic signal as well as a CO<sub>2</sub> reduction are not overly sensitive to the model assumptions and occur over a robust regime of the model parameter space. However, we also perform an explicit sensitivity study of specific major parameters, as described in the following subsection.

**SI-4.2. Sensitivity study.** The set of sensitivity model experiments is summarized in Table SI-3.

Scenarios 7, 8 and 9 (Figs. SI-7, SI-8, SI-9) repeat the sequence of 2, 3 and 4 (both sulfate and iron reduction, sulfate only and iron only, correspondingly), but the temporal structure of the forcing is prescribed to be step-like instead of Gaussian. This has the important advantage of not forcing a time scale on the model and allowing it to observe the model response time scales. The step-like forcing has exactly the same net effect as the Gaussian perturbations (see discussion of equation [SI-8] above). The first obvious conclusion from this experiment is that the amplitude of the response does not depend on the time structure of the forcing. See Figs. SI-2 and SI-7 for the remarkably similar amplitudes of DIC (panel c), isotopic signal (panel c), pH and atmospheric CO<sub>2</sub> (panel i), for example. Next, these experiments show which time dependence of the model is a result of the specified structure of the forcing and which is inherent to the model. For example, the DIC and isotopic signal clearly react to the forcing structure, while the pCO<sub>2</sub> and pH respond on the time scale of the carbonate system determined mostly by the time scale of the reaction with the bottom sediments (we assume the ocean and atmosphere to be in instantaneous equilibrium, not resolving the time scale of thousands of years involved with this equilibration).

Scenarios 10 and 11 perturb the climate sensitivity  $\Gamma$  from its value used in the original Berner model of 4 degree C per doubling of CO<sub>2</sub> to 5 and 3 degrees, correspondingly. The results are shown in Figs. SI-10 and SI-11, and are not overly sensitive to this parameter. Overall, silicate weathering provides a negative climate feedback: a reduction of atmospheric CO<sub>2</sub> leads to cooling, slowing of silicate weathering reactions and therefore the delivery of alkalinity to the ocean, and thus a decrease in the rate of CO<sub>2</sub> removal via carbonate precipitation. Larger climate sensitivity  $\Gamma$  (scenario 10) leads to stronger reduction of the minimum weathering fraction value,

to  $\alpha_{\text{wthr}} = 0.53$  at the peak of the event, to a smaller alkalinity flux and therefore to a smaller corresponding  $\text{CO}_2$  reduction, to 174 ppm. A smaller climate sensitivity (scenario 11) leads to a smaller reduction of the weathering fraction of  $\alpha_{\text{wthr}} = 0.55$ , to a larger alkalinity flux, and a corresponding  $\text{CO}_2$  reduction to 134 ppm.

The parameters  $\alpha$ ,  $\beta$  and  $\gamma$  control the amplitude of perturbations to the sulfate reduction remineralization, aerobic remineralization and oxygenic production, correspondingly (SI-7). These parameters are selected in the above scenarios to obtain results which seem interesting, yet their values are clearly somewhat arbitrary in our scenarios and therefore it is important to study their sensitivity, as is done in scenarios 12-17. The runs are summarized in Table SI-3 and shown in Figs. SI-12, SI-13, SI-14, SI-15, SI-16 and SI-17.

The change in the specified reduction in oxygenic production, controlled by  $\gamma$ , between experiments 16 and 17 is quite significant, about 25%. In response, the corresponding  $\text{CO}_2$  reduction is to 100ppm in one case and to 200ppm in the other (compare scenarios 16 and 17, Figs. SI-16i and SI-17i). So while this parameter affects the results, they are clearly not overly sensitive to its value.

A change of about 30% in the sulfate remineralization rate factor  $\alpha$ , from 0.7 to 0.9, leads from a  $\text{CO}_2$  decrease of some 200ppm, to an increase of about 100ppm (compare scenarios 12 and 13, Figs. SI-12i and SI-13i). This seems a sizeable change, but is negligible relative to the  $\text{CO}_2$  increase to 60,000ppm when no anaerobic remineralization is used (scenario 1). The model is also not overly sensitive to the aerobic remineralization rate factor,  $\beta$  (compare scenarios 12 and 13, Figs. SI-14i and SI-15i).

## SI-5. Consequences to oxygen cycle

The oxygenic fixing of organic matter, balanced by anaerobic remineralization, leads to the accumulation of oxygen in the ocean and atmosphere. On the other hand, the consumption of oxygen via sulfide oxidation and iron oxidation leads to the loss of oxygen. Consider an estimate of the magnitude of these effect and their consequences.

Begin with the oxygen production rate. The net perturbation to the aerobic remineralization and oxygenic production rates is given by (in gr C/year)  $F_{\text{net C}}(t) = \Delta F_{\text{prod}}(t) - \Delta F_{\text{remin}}(t)$ , where  $\Delta F_{\text{prod}}(t) = F_{\text{prod}}(t) - F_{\text{prod}}(0)$ . These carbon fluxes involved in the production of oxygen are shown in Fig. SI-18a. Each net mole of fixed organic carbon leads to the production of one mole of  $\text{O}_2$ , so that the implied oxygen flux into the ocean and atmosphere, in moles  $\text{O}_2$  per year, is  $F_{\text{O}_2}(t) = F_{\text{net C}}(t)/12$ , shown by the green line in Fig. SI-18b.

Next, let us address the consumption of oxygen in the scenario examined here. The two relevant reactions are those representing sulfide and iron oxidation,

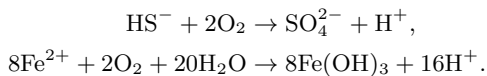

Thus oxidizing of one mole of sulfide ion involves the loss of two moles of  $\text{O}_2$ , while the oxidation of eight moles of  $\text{Fe}^{2+}$  also leads to the loss of two moles of  $\text{O}_2$ .

Combining the above oxygen sources and sinks, we can write the rate of change of oxygen (moles per liter per unit time) as follows,

$$\frac{d\text{O}_2}{dt} = \frac{1}{12}F_{\text{net C}}(t) - \frac{2}{8}F_{\text{Fe,mixing}} - 2F_{\text{H}_2\text{S,mixing}} \quad \text{[SI-36]}$$

Note that  $F_{\text{Fe,mixing}}$  is in units of moles  $\text{Fe}^{2+}$  per unit time, while  $F_{\text{H}_2\text{S,mixing}}$  is in units of moles S per unit time. The sources and sinks for oxygen are shown in Fig. SI-18b.

Combining these effects together, Fig. SI-18c shows the net oxygen production rate (source minus sinks) during the scenario. To maintain the oxygen concentration unperturbed, this flux would need to be balanced by sinks such as the  $\text{O}_2$  sink due to weathering flux, estimated at present at about  $15 \times 10^{12}$  moles  $\text{O}_2$  per year [19] and shown as the green dashed line in Fig. SI-18c. The implied net oxygen source  $F_{\text{O}_2}(t)$  and the weathering flux seem to be of similar magnitudes, suggesting that the weathering flux and other sinks may have been able to regulate the oxygen level during the scenario. However, we need to remember that the weathering flux before the advent of land plants could have been as much as one order of magnitude weaker.

The implied oxygen source is therefore a non negligible addition to the ocean-atmosphere oxygen pool. If this leads to a significant rise in the atmospheric oxygen level, then the ocean anoxia may be reduced, affecting the assumptions behind the scenario considered here. The mechanisms maintaining the atmospheric oxygen concentration are not completely understood [19], and it is difficult to estimate therefore how efficient they would be in keeping the oxygen level down during such an injection of oxygen into the ocean and atmosphere. All we can currently do is point out this significant potential difficulty with the scenario examined here.

The ideas discussed here may be relevant to the suggestion of [20] that a pre-snowball drawdown of atmospheric oxygen into the ocean, leading to DOM oxidation and therefore to atmospheric  $\text{pCO}_2$  increase, may help stabilize a slushball and prevent a hard snowball. We note that if the remineralization occurs via anaerobic processes as discussed here, followed by pyrite and siderite formation, this may lead to a drawdown of atmospheric  $\text{pCO}_2$  instead.

## SI-6. Sanity checks

The following order-of-magnitude checks on the results of the model help obtain some additional insight into the quantitative calculations and workings of the model, and serve as an additional check on the model results. Unless noted otherwise, we base these calculation on scenario #7 with step-like forcing, for which it is simpler to estimate the total perturbation to the forcing and the amplitude of the response, and compare to the shown results of the time dependent model calculations. All values used for the calculations below can be obtained from the shown Figures.

- Is the change in DOC consistent with the prescribed fluxes? The perturbations in aerobic remineralization, oxygenic production, sulfate reduction and iron reduction sum to a net remineralization rate of  $1.6\text{e-}4 - 6.38\text{e-}4 + 1.1\text{e-}4 + 6.38\text{e-}4 = 2.7\text{e-}4$  peta kg/yr for 0.604e6yr, and should lead to a  $2.7\text{e-}4 \times 1\text{e}15 \text{ kg C/yr} \times 0.604\text{e}6\text{yr} = 160\text{e}+15 \text{ kg C}$  change in DOC, consistent with Fig. SI-7c.
- Is the isotopic signal consistent with the amount of DOC remineralized? Given the initial ( $\delta_0$ ) and final ( $\delta_1$ ) isotopic concentrations, we can write the isotopic mass balance for  $^{13}\text{C}$  as,

$$\begin{aligned} 200(\text{DOC}) \times \delta_0 + 50(\text{DIC}) \times (\delta_0 + 28) \\ = 50(\text{DOC}) \times \delta_1 + 200(\text{DIC}) \times (\delta_1 + 28) \end{aligned}$$

which gives a change in the isotopic composition of  $\delta_0 - \delta_1 = 16$ , again consistent with Fig. SI-7c.

- Charge balance/ alkalinity: turning off the weathering feedback, dissolution and precipitation of calcium carbonate, and pyrite and siderite deposition, we verify that the

charge added via sulfate reduction is exactly balanced by changes to the carbonate, boron and sulfide charge concentration changes (Figure not shown, see scenario 18 in code files distributed with SI).

- DIC units: panel (b) of Fig 3 in the paper shows an increase in DIC concentration to be 0.208 mmole/liter (from 2.213 mmole/liter before the perturbation to 2.421 after the perturbation); the increase in the new equilibrium is due to the elimination of some of the Calcium. Panel (c) shows the increase in the total DIC to be 3.42 peta kg (from 36.38 peta kg to 39.80 peta kg). Multiplying the concentration by the ocean volume  $13.7e20$  liter and then by  $12e-6$  kg C/mmole, we see that the two diagnostics represent the same increase.
- How much oxygen is produced?  
In scenario 7, oxygenic production of organic matter decreases during the event by  $(0.0036-0.00344)=1.6e-4$  peta kg/yr; aerobic remin decreased by a larger amount of  $(0.003564-0.002926)=6.38e-4$  peta kg/yr. Net addition to oxygenic production is therefore  $4.78e-4$  peta kg/yr. The perturbation lasts  $(1.801-1.197)=0.604$  Myr, so the implied accumulated carbon is  $(4.78e-4 \text{ peta kg/yr}) \times (0.604e6 \text{ yr})=2.887e17 \text{ kg C}$ , which is equal to  $(2.887e20 \text{ g C})/(12 \text{ g C/mole})=2.4e19 \text{ mole C}$ . Each mole of produced organic carbon leads to the production of one mole of  $O_2$ , so we have a net  $O_2$  production:  $2.4e19 \text{ mole } O_2$ , or a production rate of  $4e13 \text{ mole } O_2/\text{yr}$ .  
However, as discussed in section below, oxygen is also consumed by  $Fe^{2+}$  and  $H_2S$  oxidation. Consider these fluxes next. The time scales for pyrite formation and sulfide oxidation are the same, so that half of the sulfide formed via sulfate reduction is oxidized (see  $\tau_{\text{pyrite}}$  and  $\tau_{\text{mixing}}$  in Table SI-2). Similarly, the time scales for siderite formation and  $Fe^{2+}$  oxidation are the same, so that half of the  $Fe^{2+}$  produced by iron reduction is oxidized (see  $\tau_{\text{siderite}}$  and  $\tau_{\text{mixing}}$  in Table SI-2).

First, calculate the oxygen sink due to iron remineralization. The perturbation to iron remineralization via reduction is  $0.003036-0.002926=1.1e-4$  peta kg/yr, which amounts to  $(1.1e-1 \text{ peta g C/yr})/(12 \text{ g C/mole C})=9.17e12 \text{ mole C/year}$ . Now, 4 moles of  $Fe^{2+}$  are produced per one mole of remineralized organic carbon (SI-19), so the above amounts to  $36.68e12 \text{ mole Fe(II)/year}$ . Half of this is oxidized, and each oxidized mole of  $Fe(II)$  consumes 0.25 mole of  $O_2$  (SI-19), so we expect the  $O_2$  consumption rate to be  $36.68e12 \times 0.5 \times 0.25=4.585e12 \text{ moles } O_2/\text{year}$ , and over the perturbation period, this results in an Fe sink of  $(4.585e12 \text{ moles } O_2/\text{year}) \times (0.604e6 \text{ yr})=2.77e18 \text{ mole } O_2$ .

Next, calculate the oxygen sink due to sulfide oxidation. The perturbation to remineralization via sulfate reduction is  $0.003564-0.002926=6.38e-4$  peta kg/yr, which amounts to  $(6.38e-1 \text{ peta g/yr})/(12 \text{ g C/mole C})=5.32e+13 \text{ mole C/year}$ . Now, half a mole of sulfide ion  $HS^-$  is produced per mole of remineralized carbon (SI-16) so the above sulfate reduction rate amounts to the production of  $2.66e13 \text{ mole } HS^-/\text{year}$ . Half of this is oxidized, and each oxidized mole of  $HS^-$  requires two moles of  $O_2$ , so we expect the  $O_2$  consumption rate to be  $(2.66e13 \text{ mole } HS^-/\text{year}) \times 0.5 \times 2=2.66e13 \text{ mole } O_2/\text{year}$ . Over the time of the perturbation, this should lead to an  $O_2$  sink:  $S_{H_2S}=(2.66e13 \text{ mole } O_2/\text{year}) \times (0.604e6 \text{ yr})=1.61e+19 \text{ mole } O_2$ .

The total net production of  $O_2$  is therefore  $Source - S_{H_2S} - S_{Fe} = 2.4e19 - 2.77e18 - 1.61e19 = 5.13e18 \text{ mole } O_2$  over a period of 0.604 Myr, or a rate of  $8.5e12 \text{ mole } O_2/\text{year}$ . These need to be compared with the present-day atmospheric content of oxygen, about  $3e19$  moles, and with the present-day sink of  $O_2$  due to weathering and volcanoes of  $1.5e13 \text{ mole } O_2/\text{year}$ . The similarity of the flux of produced oxygen and of the oxygen sink makes it not implausible that this source flux could be regulated by the sink to keep oxygen concentration at a low value.

- Berelson WM, Hammond DE, McManus J, Kilgore TE (1994) Dissolution kinetics of calcium carbonate in equatorial pacific sediments. *Global Biogeochem. Cycles* 8:219–235.
- Berner R (1994) GEOCARB-II - a revised model of atmospheric  $CO_2$  over Phanerozoic time. *American Journal of Science* 294:56–91.
- Dong H, Jaisi DP, Kim J, Zhang G (2009) Microbe-clay mineral interactions. *American Mineralogist* 94:1505–1519.
- Kostka J, Haefele E, Viehweger R, Stucki J (1999) Respiration and dissolution of iron(III) containing clay minerals by bacteria. *Environmental Science & Technology* 33:3127–3133.
- Zeebe R, Wolf-Gladrow D (2001)  $CO_2$  in seawater: equilibrium, kinetics, isotopes. Elsevier Oceanography Series (Elsevier) Vol. 65.
- Hofmann AF, Soetaert K, Middelburg JJ, Meysman FJR (2010) AquaEnv - an aquatic acid-base modelling environment in R. *Aquatic Geochemistry* DOI 10.1007/s10498-009-9084-1.
- Rickard D, Luther, III GW (2007) Chemistry of iron sulfides. *Chemical Reviews* 107:514–562.
- Berner RA (1970) Sedimentary pyrite formation. *American Journal of Science* 268:1–23.
- Berner R (1972) Sulfate reduction, pyrite formation, and the oceanic sulfur budget (Wiley Interscience division of John Wiley and sons, Inc), pp 347–361.
- Berner RA (1984) Sedimentary pyrite formation - an update. *Geochimica et Cosmochimica Acta* 48:605–615.
- Drobner E, Huber H, Wachtershauser G, Rose D, Stetter KO (1990) Pyrite formation linked with hydrogen evolution under anaerobic conditions. *Nature* 346:742–744.
- Benning LG, Wilkin RT, Barnes HL (2000) Reaction pathways in the Fe-S system below 100 degrees C. *Chemical Geology* 167:25–51.
- Rickard D, Butler I, Oldroyd A (2001) A novel iron sulphide mineral switch and its implications for earth and planetary science. *Earth and Planetary Science Letters* 189:85–91.
- Butler I, Bottcher M, Rickard D, Oldroyd A (2004) Sulfur isotope partitioning during experimental formation of pyrite via the polysulfide and hydrogen sulfide pathways: implications for the interpretation of sedimentary and hydrothermal pyrite isotope records. *Earth and Planetary Science Letters* 228:495–509.
- Rickard D (1969) The chemistry of iron sulfide formation at low temperatures. *Stockholm Contrib. Geol.* 20:67–95.
- Harmandas N, Fernandez E, Koutsoukos P (1998) Crystal growth of pyrite in aqueous solutions. inhibition by organophosphorus compounds. *Langmuir* 14:1250–1255.
- Donald R, Southam G (1999) Low temperature anaerobic bacterial diagenesis of ferrous monosulfide to pyrite. *Geochimica et Cosmochimica Acta* 63:2019–2023.
- Schrag DP, Berner RA, Hoffman PF, Halverson GP (2002) On the initiation of a snowball Earth. *Geochemistry Geophysics Geosystems* 3.
- Catling DC, Claire MW (2005) How Earth's atmosphere evolved to an oxic state: A status report. *Earth Planet. Sci. Lett.* 237:1–20.
- Peltier WR, Liu Y, Crowley JW (2007) Snowball earth prevention by dissolved organic carbon remineralization. *Nature* 450:813–U1.



**Table SI-1. Order of variables of the expanded carbonate system, and the Jacobian [SI-26] for solving it.**

$$X = \begin{bmatrix} H^+ & OH^- & CO_2(g) & H_2CO_3^* & HCO_3^- & CO_3^{-2} & B(OH)_3 & B(OH)_4^- \\ 1 & 2 & 3 & 4 & 5 & 6 & 7 & 8 \\ HSO_4^- & SO_4^{2-} & H_2S(aq) & HS^- & & & & \\ 9 & 10 & 11 & 12 & & & & \end{bmatrix}$$

$$\left\{ \frac{\partial F_i}{\partial X_j} \right\} = \begin{pmatrix} -OH^- & -H^+ & 0 & 0 & 0 & 0 & 0 & 0 & 0 & 0 & 0 & 0 \\ 0 & 0 & K_0 & -1 & 0 & 0 & 0 & 0 & 0 & 0 & 0 & 0 \\ -HCO_3^- & 0 & 0 & K_1 & -H^+ & 0 & 0 & 0 & 0 & 0 & 0 & 0 \\ -CO_3^{2-} & 0 & 0 & 0 & K_2 & -H^+ & 0 & 0 & 0 & 0 & 0 & 0 \\ -SO_4^{2-} & 0 & 0 & 0 & 0 & 0 & 0 & 0 & K_{HSO_4} & -H^+ & 0 & 0 \\ -B(OH)_4^- & 0 & 0 & 0 & 0 & 0 & K_B & -H^+ & 0 & 0 & 0 & 0 \\ -HS^- & 0 & 0 & 0 & 0 & 0 & 0 & 0 & 0 & 0 & K_{H_2S,1} & -H^+ \\ 0 & 0 & 0 & 1 & 1 & 1 & 0 & 0 & 0 & 0 & 0 & 0 \\ 0 & 0 & 0 & 0 & 0 & 0 & 1 & 1 & 0 & 0 & 0 & 0 \\ 0 & 0 & 0 & 0 & 0 & 0 & 0 & 0 & 1 & 1 & 0 & 0 \\ 0 & 0 & 0 & 0 & 0 & 0 & 0 & 0 & 0 & 0 & 1 & 1 \\ -1 & 1 & 0 & 0 & 1 & 2 & 0 & 1 & 1 & 2 & 0 & 1 \end{pmatrix}$$

**Table SI-2. Model parameters that remain constant across different runs presented in this paper.**

| Parameter         | Value              | Description                                 |
|-------------------|--------------------|---------------------------------------------|
| $F_{in}$          | 0.15e-3 Gt C/yr    | volcanic CO <sub>2</sub> flux               |
| $\delta_{in}$     | -6 permil          | volcanic $\delta^{13}C$                     |
| $\epsilon$        | -28 permil         | organic matter fractionation                |
| $F_{prod,0}$      | 3.6e-3 Gt C/yr     | background production rate                  |
| $\alpha_{remin}$  | 0.99               | background remineralization fraction        |
| $Alk_0$           | 2300 $\mu$ mol/lit | scale in CaCO <sub>3</sub> dissolution      |
| $\tau_{CaCO_3}$   | 5e3 yr             | time scale in CaCO <sub>3</sub> dissolution |
| $\tau_{mixing}$   | 3e3 yr             | ocean mixing time scale                     |
| $\tau_{pyrite}$   | 3e3 yr             | pyrite formation time scale                 |
| $\tau_{siderite}$ | 3e3 yr             | siderite formation time scale               |
| $V_{ocean}$       | 1.37e21 liter      | ocean volume                                |
| $\Gamma$          | 6°C                | weathering parameter                        |
| $\tau_{ep}$       | 0.3e6 yr           | time scale for imposed perturbation         |

**Table SI-3. Model experiments, specifying parameters which vary among model scenarios presented in the paper and supplementary information. All values correspond to nondimensional amplitudes as follows (equations [SI-7]):  $U$  is the nondimensional amplitude of the export production perturbation;  $\alpha$  of the increase in sulfate reduction;  $\beta$  of the drop in aerobic remineralization;  $\gamma$  of the drop in oxygenic production;  $\eta$  of the increase in iron remineralization.**

|        | description                      | Fig   | $U$ | $\alpha$ | $\beta$ | $\gamma$ | $\eta$ |
|--------|----------------------------------|-------|-----|----------|---------|----------|--------|
| run 1  | aerobic remineralization         | SI-1  | 13  | 0        | 0       | 1        | 0      |
| run 2  | sulfate and iron                 | SI-2  | 25  | 0.8      | 0.8     | 0.2      | 0.138  |
| run 3  | sulfate only                     | SI-3  | 73  | 1        | 1       | 0.12     | 0      |
| run 4  | iron only                        | SI-4  | 4.7 | 0        | 0       | 0.77     | 1      |
| run 5  | $\delta^{13}C$ w/o $CO_2$ signal | SI-5  | 25  | 0.45     | 0.8     | 0.55     | 0.138  |
| run 6  | $CO_2$ w/o $\delta^{13}C$ signal | SI-6  | 4.8 | 0.6      | 0.8     | 0.12     | 0.1    |
| run 7  | like 02 with step forcing        | SI-7  | 25  | 0.8      | 0.8     | 0.2      | 0.138  |
| run 8  | like 03 with step forcing        | SI-8  | 73  | 1        | 1       | 0.12     | 0      |
| run 9  | like 04 with step forcing        | SI-9  | 4.7 | 0        | 0       | 0.77     | 1      |
| run 10 | $\Gamma = 5^\circ / \log(2)$     | SI-10 | 25  | 0.8      | 0.8     | 0.2      | 0.138  |
| run 11 | $\Gamma = 3^\circ / \log(2)$     | SI-11 | 25  | 0.8      | 0.8     | 0.2      | 0.138  |
| run 12 | sensitivity to $\alpha$          | SI-12 | 25  | 0.7      | 0.8     | 0.2      | 0.138  |
| run 13 | sensitivity to $\alpha$          | SI-13 | 25  | 0.9      | 0.8     | 0.2      | 0.138  |
| run 14 | sensitivity to $\beta$           | SI-14 | 25  | 0.8      | 0.9     | 0.2      | 0.138  |
| run 15 | sensitivity to $\beta$           | SI-15 | 25  | 0.8      | 0.7     | 0.2      | 0.138  |
| run 16 | sensitivity to $\gamma$          | SI-16 | 25  | 0.8      | 0.8     | 0.18     | 0.138  |
| run 17 | sensitivity to $\gamma$          | SI-17 | 25  | 0.8      | 0.8     | 0.22     | 0.138  |

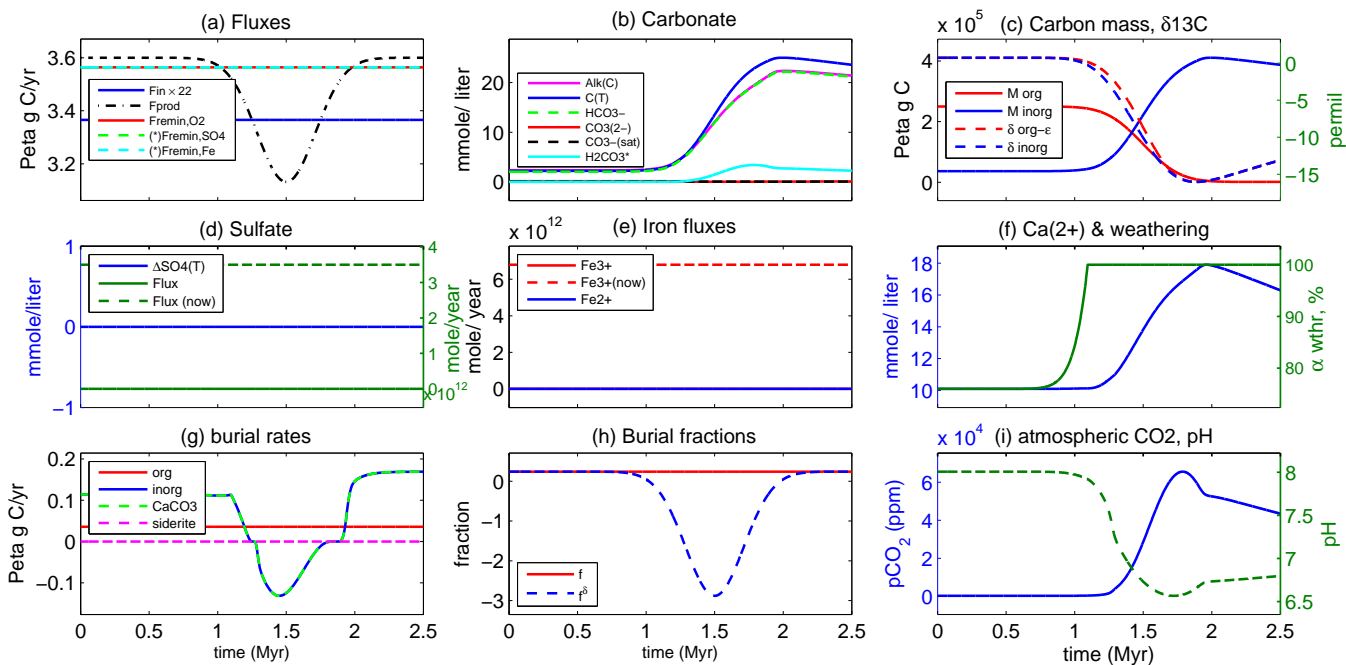

**Fig. SI-1.** Fuller details of scenario #1 shown in Fig. 1 in the paper, with no iron or sulfate reduction, leading to an isotopic excursion of 15 permil, as well as to a dramatic increase in  $p\text{CO}_2$ . The green curve in panel (f) shows the *fraction* of volcanic  $\text{CO}_2$  entering the ocean via weathering. The fraction is physically limited to the range (0,1), and in this case reached saturation as calculated following [2]. Please see caption of Fig. 3 in the paper for details.

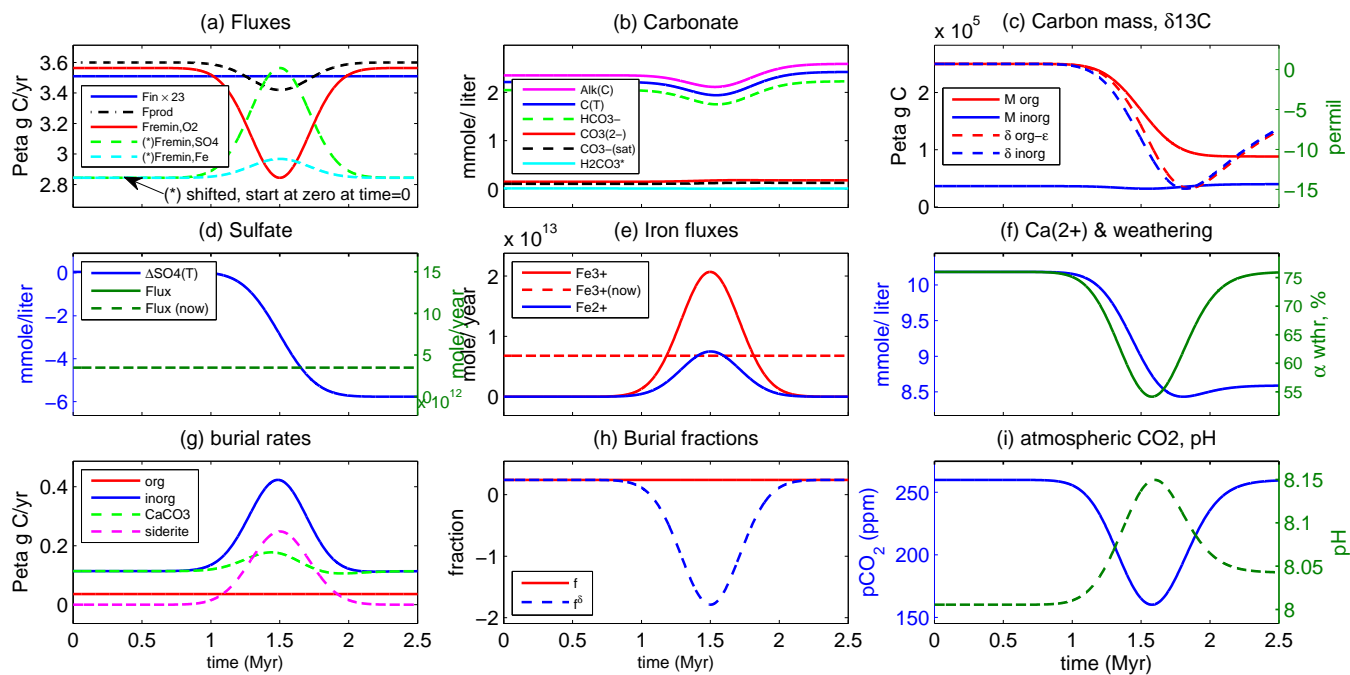

**Fig. SI-2.** Scenario #2 also shown in Fig. 3 in the paper, with both iron and sulfate reduction, leading to an isotopic excursion of 15 permil, as well as to a decrease in  $p\text{CO}_2$ .

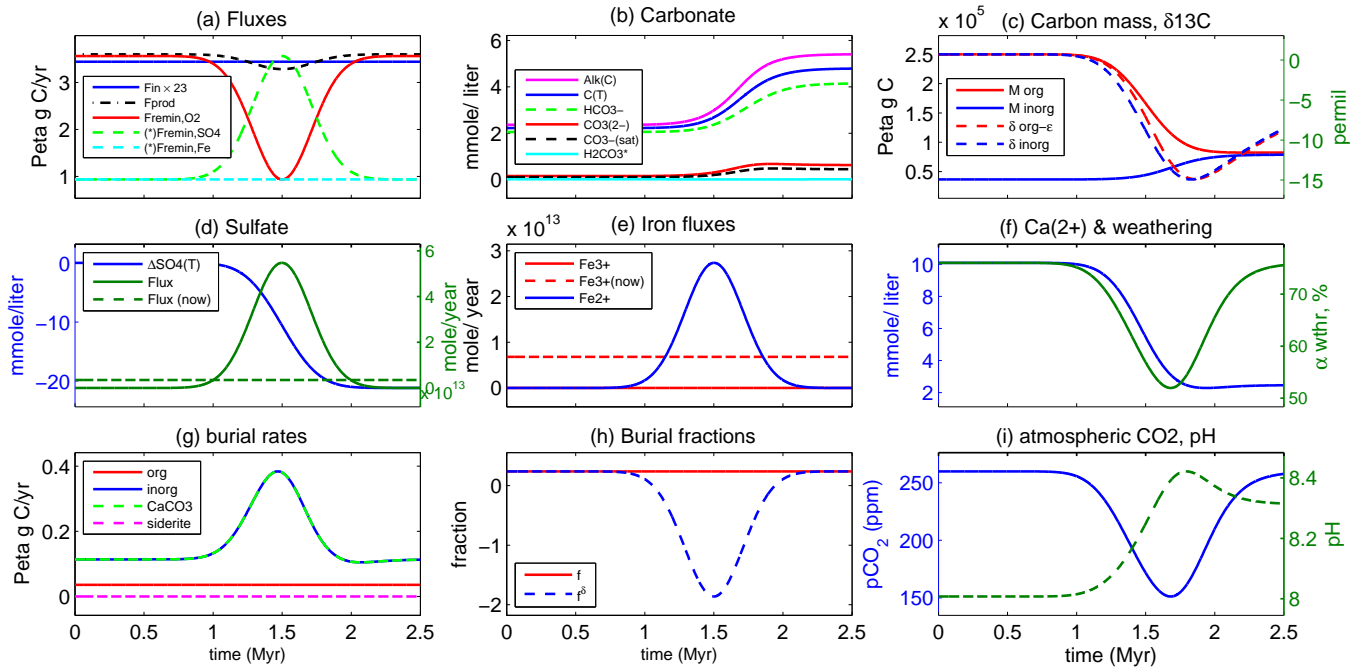

**Fig. SI-3.** Scenario #3, leading to the same isotopic signal and CO<sub>2</sub> drawdown as scenario #2 of Fig. 3 in the paper, but using only sulfate reduction, and no iron reduction.

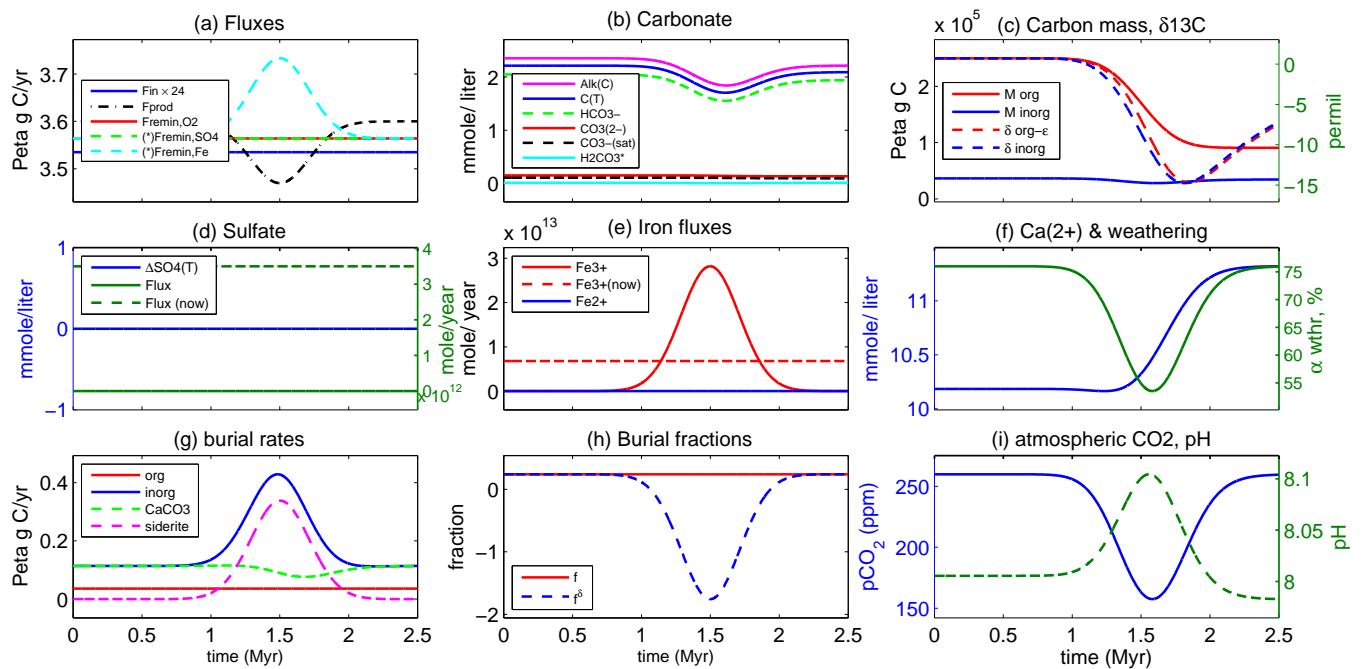

**Fig. SI-4.** Scenario #4, leading to the same isotopic signal and CO<sub>2</sub> drawdown as scenario #2 of Fig. 3 in the paper, but using only iron reduction, and no sulfate reduction.

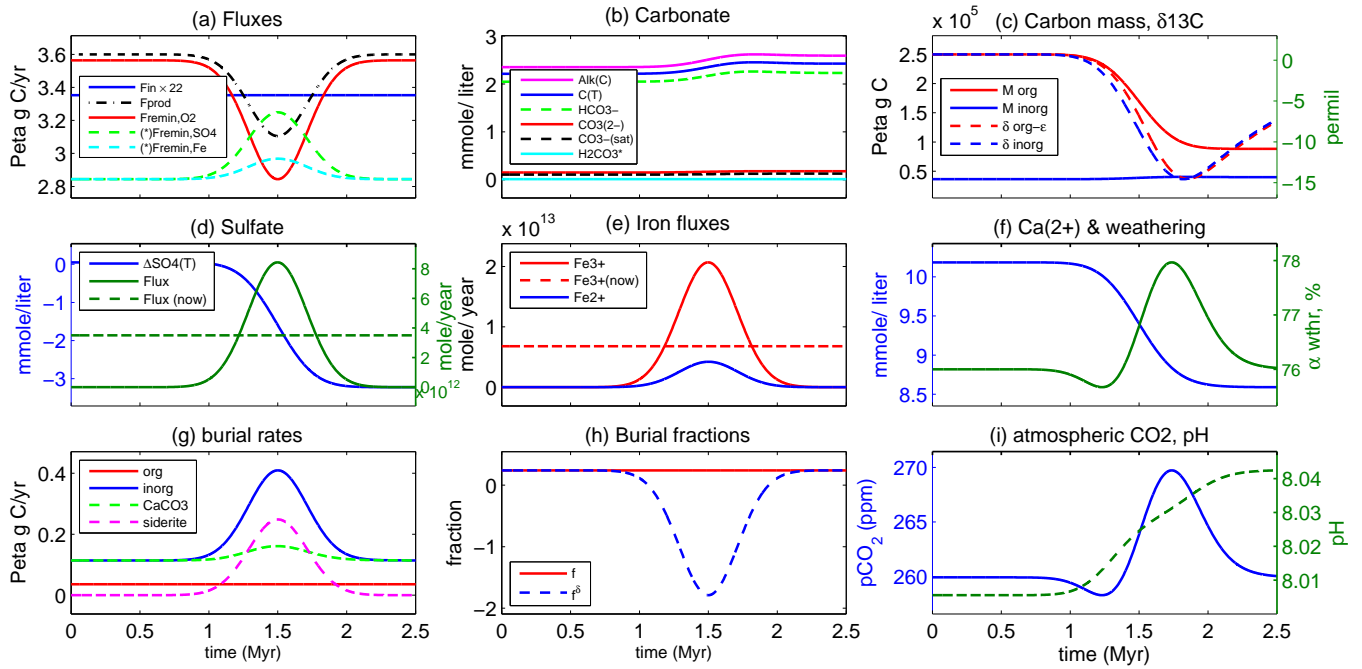

**Fig. SI-5.** Scenario #5, leading to the same isotopic signal as scenario #2 of Fig. 3 in the paper, but with basically no change to the atmospheric  $p\text{CO}_2$ .

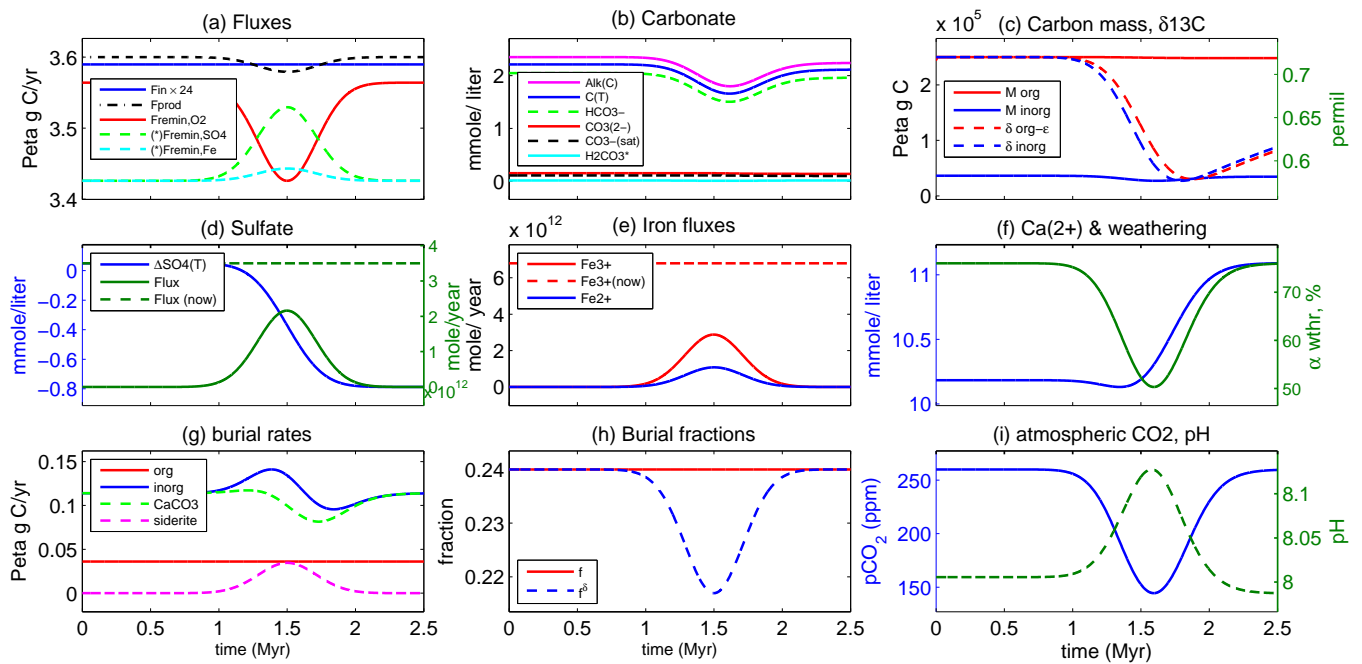

**Fig. SI-6.** Scenario #6, leading to the same  $p\text{CO}_2$  drawdown as scenario #2 of Fig. 3 in the paper, but with practically no isotopic signal.

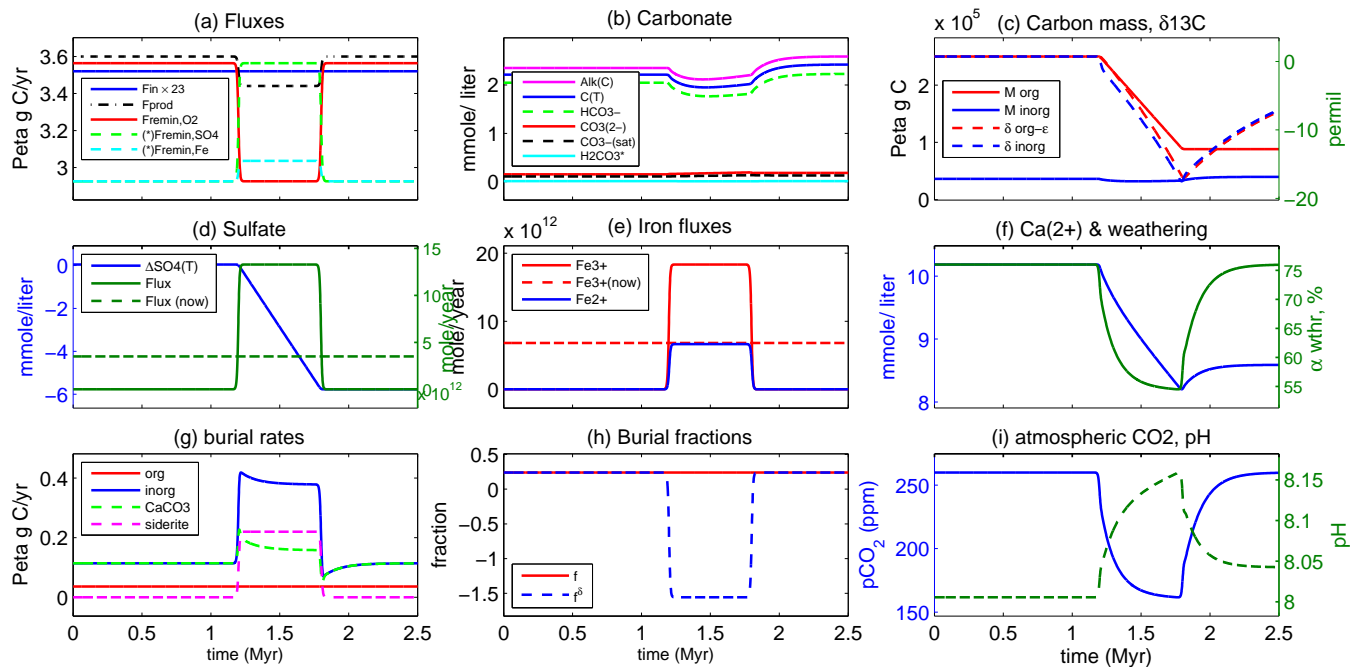

**Fig. SI-7.** Scenario #7, same as 2, but with step function forcing.

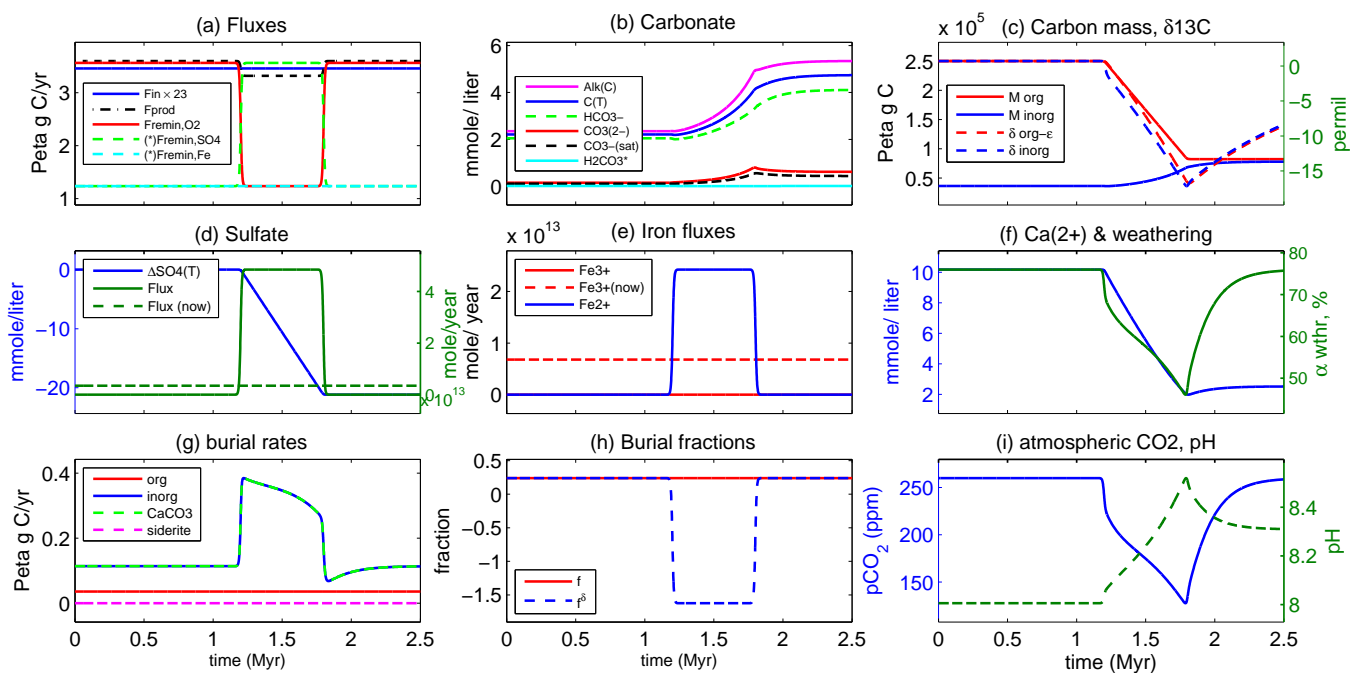

**Fig. SI-8.** Scenario #8, same as 3, but with step function forcing.

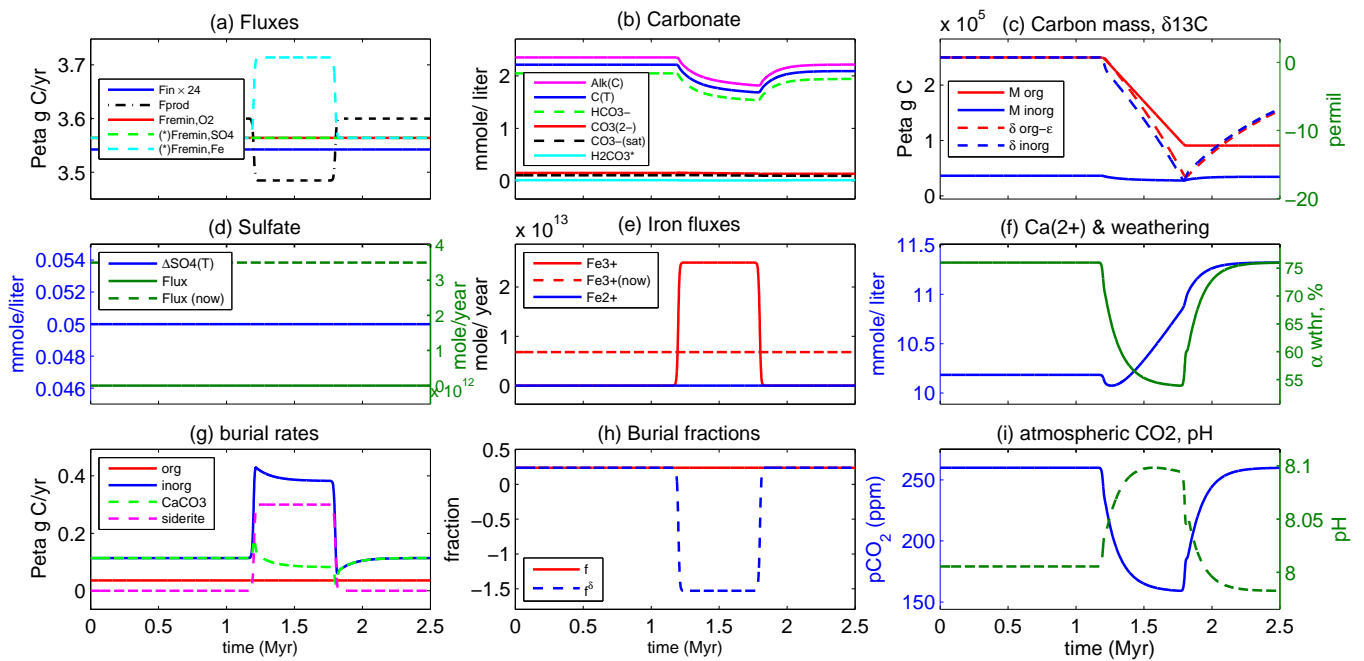

**Fig. SI-9.** Scenario #9, same as 4, but with step function forcing.

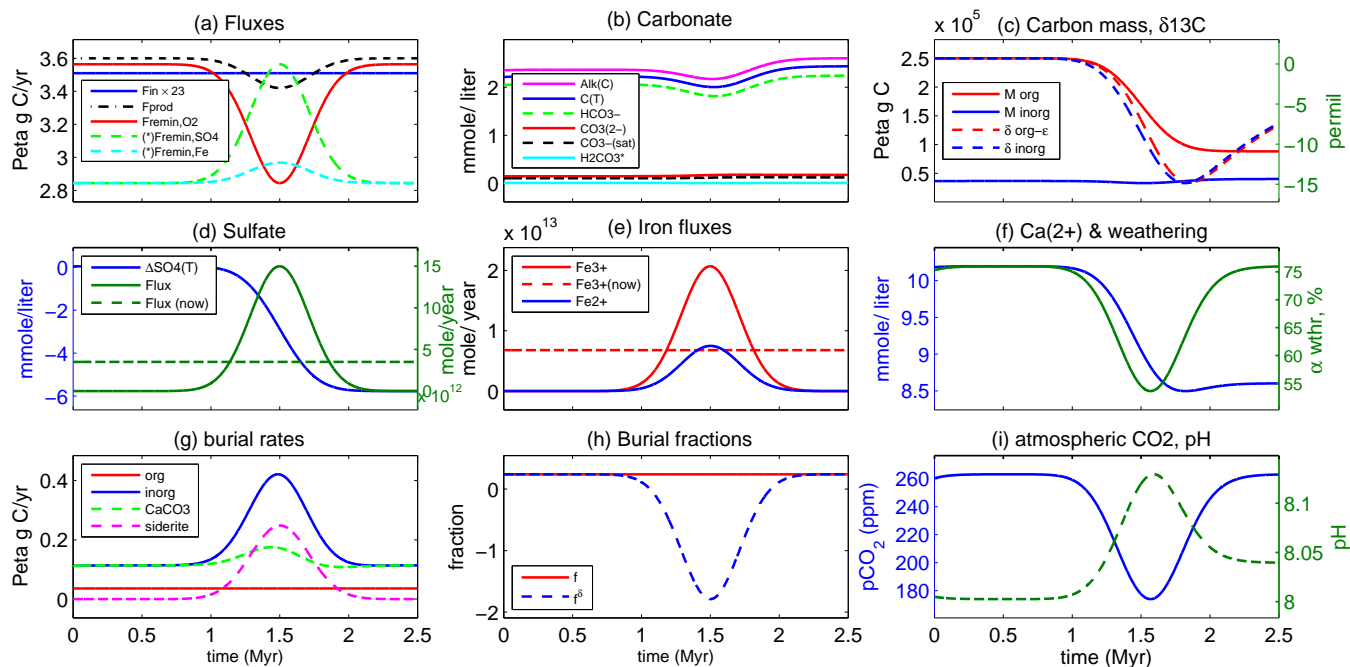

**Fig. SI-10.** Scenario #10, as in 2, except that climate sensitivity is set to 5 degree C per doubling of  $\text{CO}_2$  instead of 4.

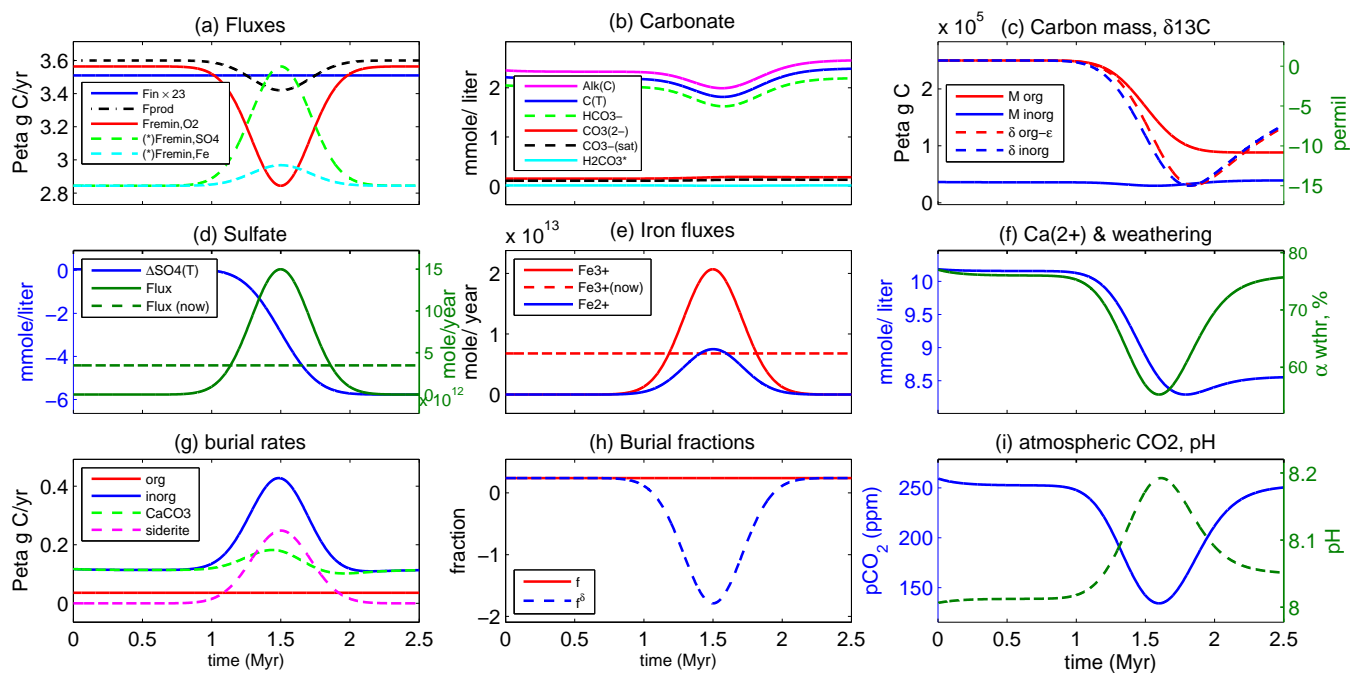

**Fig. SI-11.** Scenario #11, as in 2, except that climate sensitivity is set to 3 degree C per doubling of  $\text{CO}_2$  instead of 4.



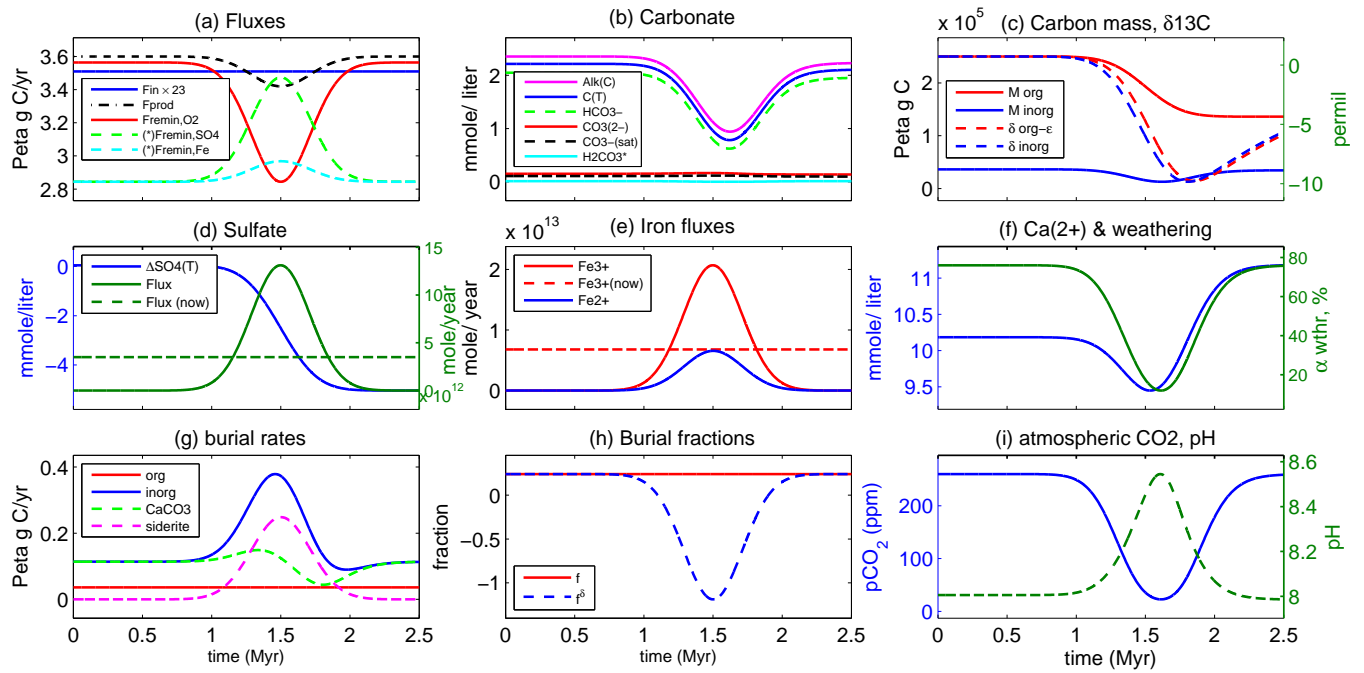

**Fig. SI-12.** Scenario #12, as in 2, except that sulfate remineralization rate factor is set to  $\alpha = 0.7$  instead of 0.8.

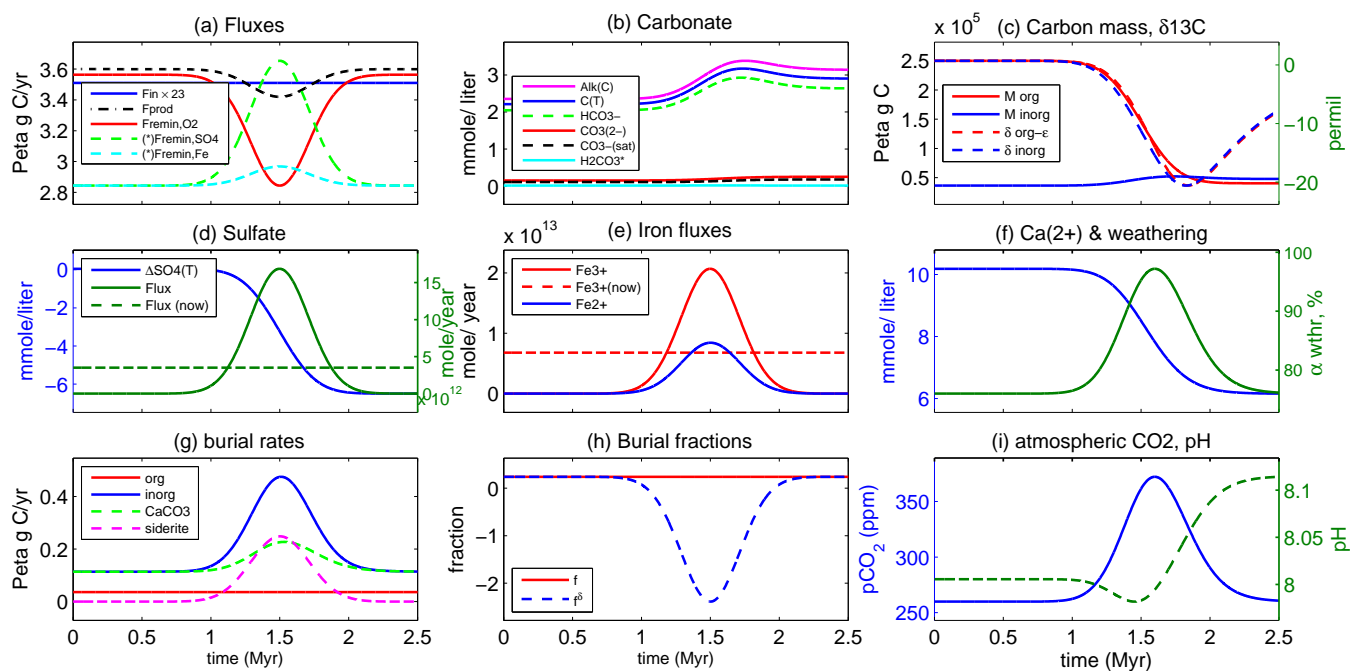

**Fig. SI-13.** Scenario #13, as in 2, except that sulfate remineralization rate factor is set to  $\alpha = 0.9$  instead of 0.8.

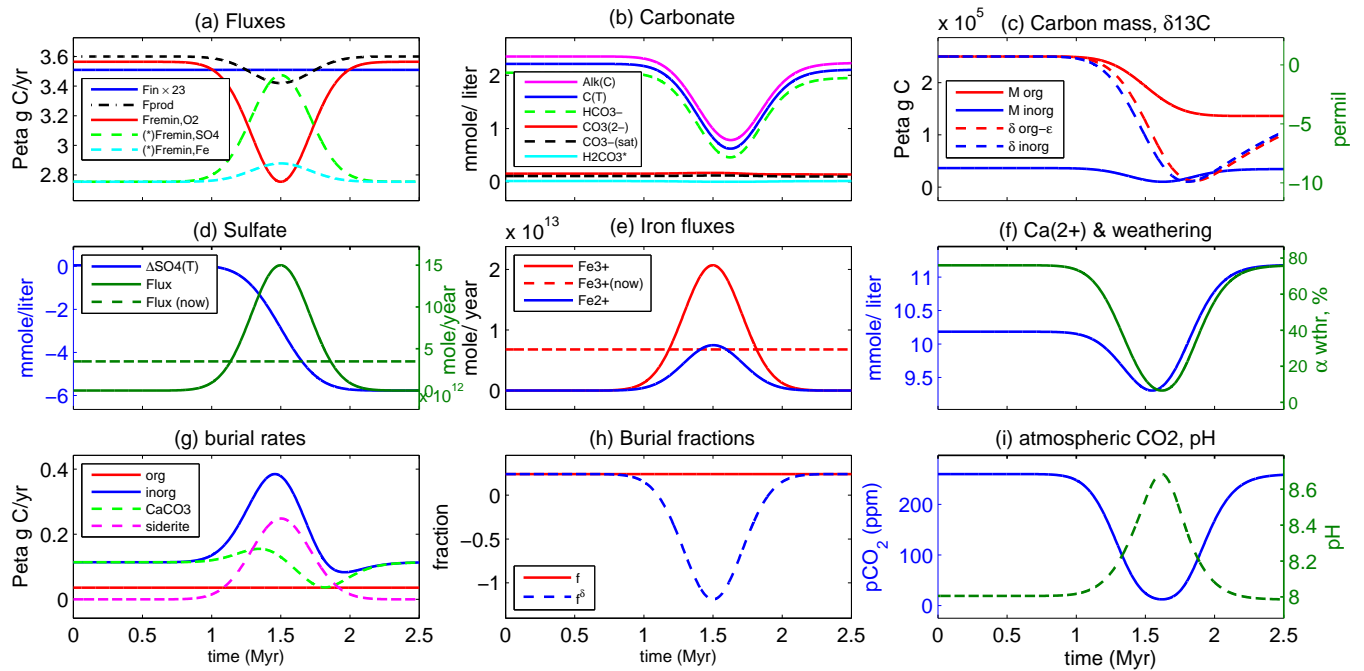

**Fig. SI-14.** Scenario #14, as in 2, except that the aerobic remineralization rate factor is set to  $\beta = 0.9$  instead of 0.8.

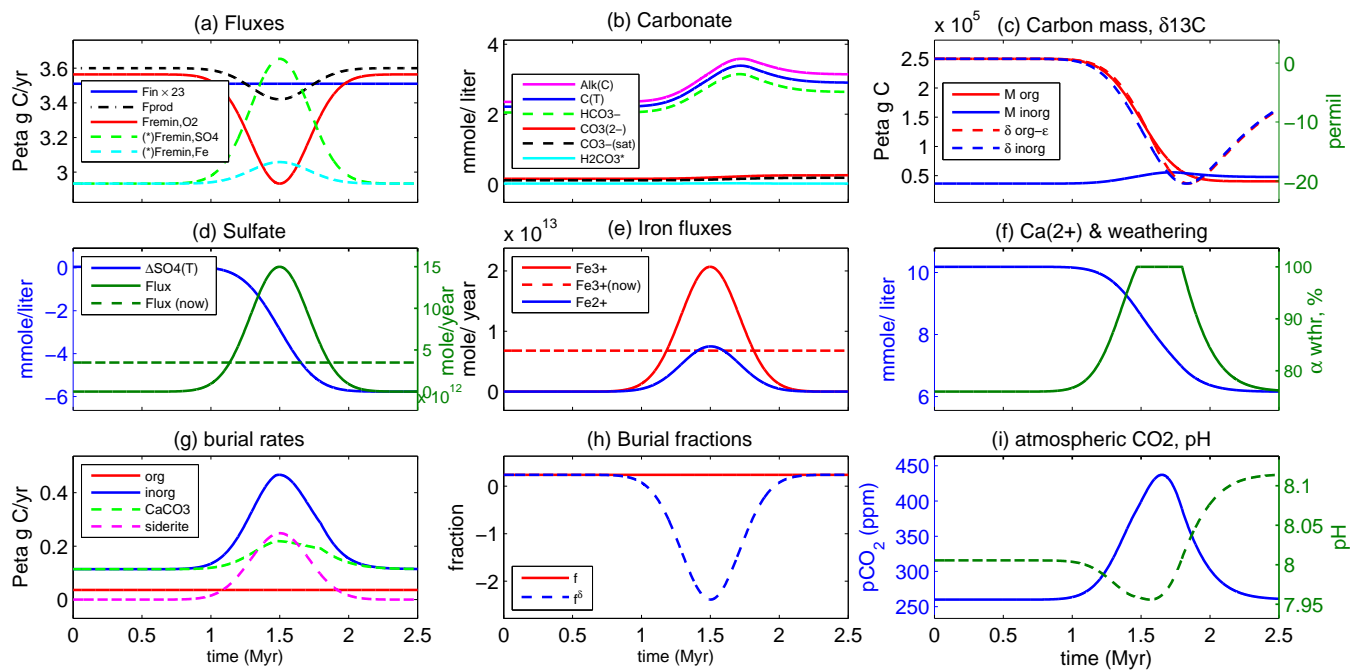

**Fig. SI-15.** Scenario #15, as in 2, except that the aerobic remineralization rate factor is set to  $\beta = 0.7$  instead of 0.8.

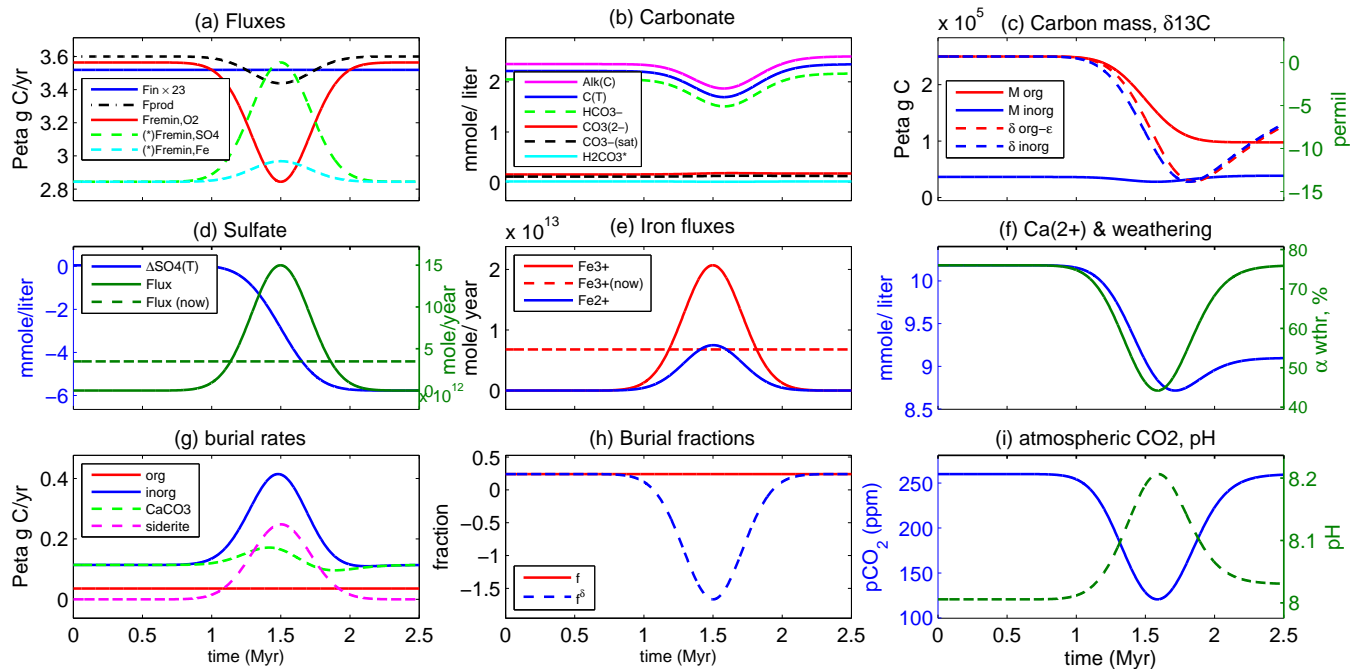

**Fig. SI-16.** Scenario #16, as in 2, except that the oxygenic production rate factor is set to  $\gamma = 0.18$  instead of 0.2.

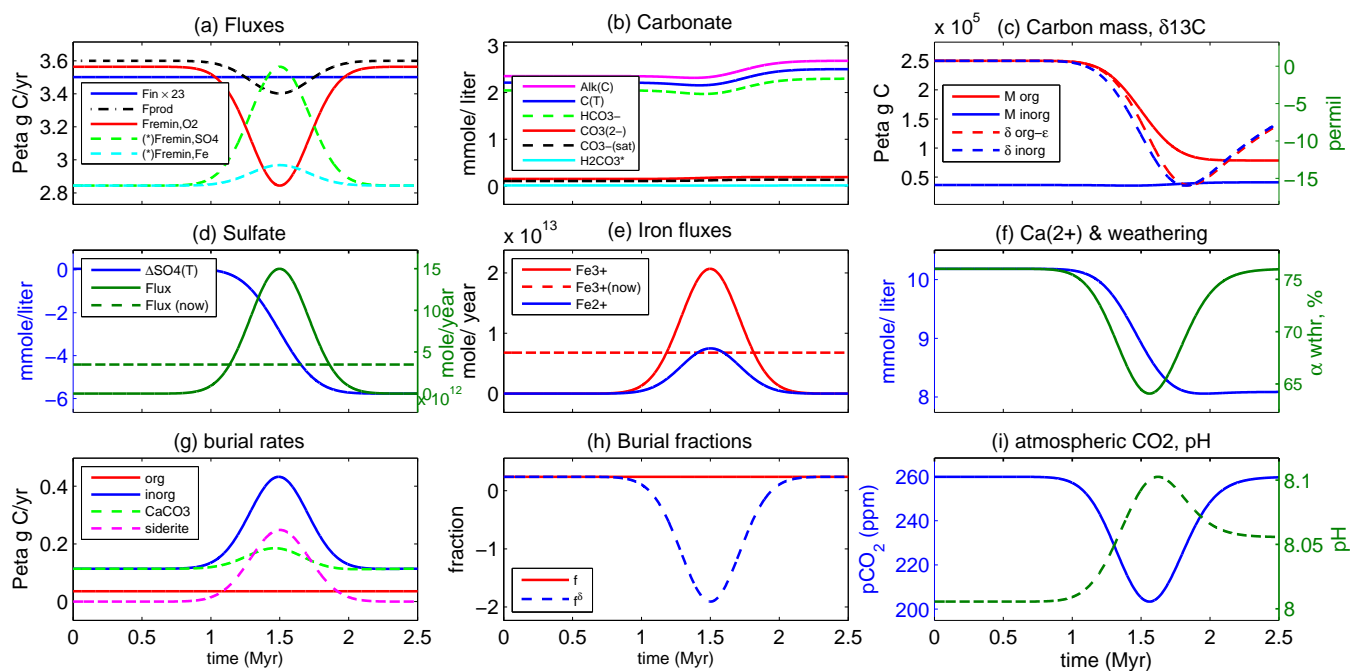

**Fig. SI-17.** Scenario #17, as in 2, except that the oxygenic production rate factor is set to  $\gamma = 0.22$  instead of 0.2.

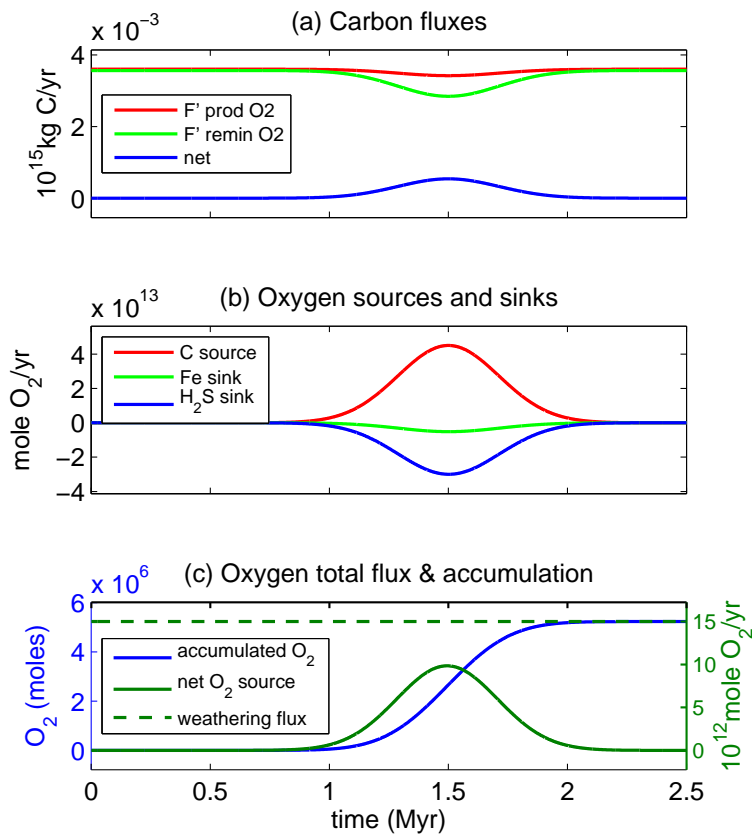

**Fig. SI-18.** Oxygen consequences of scenario #2. (a) Oxygenic production and remineralization carbon fluxes, and implied net anomalous carbon flux (anomaly in production minus anomaly in remineralization, (section SI-5)). (b) Sources and sinks of oxygen due to net oxygenic organic carbon production (red), Fe<sup>2+</sup> oxidation (green) and sulfide oxidation (blue). (c) Total O<sub>2</sub> source (solid green), present-day weathering sink of O<sub>2</sub> (dashed green), and the total accumulating O<sub>2</sub> due to the net carbon flux, in the absence of any sinks (solid blue).
